## 1        **Three-dimensional drug screen identifies HDAC inhibitors as therapeutic** 2        **agents in mTORC1-driven lymphangioliomyomatosis**

3  
4        **Authors:** Adam Pietrobon<sup>1,2,3</sup>, Julien Yockell-Lelièvre<sup>1,3</sup>, Nicole Melong<sup>4</sup>, Laura J. Smith<sup>5,6,7</sup>,  
5        Sean P. Delaney<sup>1,2,3</sup>, Nadine Azzam<sup>4</sup>, Chang Xue<sup>6,7</sup>, Nishanth Merwin<sup>8</sup>, Eric Lian<sup>1,2,3</sup>, Alberto  
6        Camacho-Magallanes<sup>1,2,3</sup>, Carole Doré<sup>1</sup>, Gabriel Musso<sup>8</sup>, Lisa M. Julian<sup>9</sup>, Arnold S. Kristof<sup>10</sup>,  
7        Roger Y. Tam<sup>11</sup>, Jason N. Berman<sup>2,4</sup>, Molly S. Shoichet<sup>5,6,7,12</sup>, William L. Stanford<sup>1,2,3\*</sup>

### 8 9        **Affiliations:**

10        <sup>1</sup> The Sprott Centre for Stem Cell Research, Regenerative Medicine Program, Ottawa Hospital  
11        Research Institute; Ottawa, Canada.

12        <sup>2</sup> Department of Cellular and Molecular Medicine, University of Ottawa; Ottawa, Canada.

13        <sup>3</sup> Ottawa Institute of Systems Biology; Ottawa, Canada.

14        <sup>4</sup> Department of Pediatrics, CHEO Research Institute; Ottawa, Canada.

15        <sup>5</sup> Department of Chemical Engineering and Applied Chemistry, University of Toronto; Toronto,  
16        Canada.

17        <sup>6</sup> Institute for Biomaterials and Biomedical Engineering, University of Toronto; Toronto,  
18        Canada.

19        <sup>7</sup> The Donnelly Centre for Cellular and Biomolecular Research; Toronto, Canada.

20        <sup>8</sup> BioSymetrics, Inc; Toronto, Canada.

21        <sup>9</sup> Centre for Cell Biology, Development, and Disease, Department of Biological Sciences, Simon  
22        Fraser University; Burnaby, Canada.

23        <sup>10</sup> Meakins-Christie Laboratories and Translational Research in Respiratory Diseases Program,  
24        Research Institute of the McGill University Health Centre, Faculty of Medicine, Departments of  
25        Medicine and Critical Care; Montreal, Canada.

26        <sup>11</sup> Centre for Biologics Evaluation, Biologic and Radiopharmaceutical Drugs Directorate, Health  
27        Canada; Ottawa, Canada.

28        <sup>12</sup> Department of Chemistry, University of Toronto; Toronto, Canada.

29  
30        \* Corresponding author

31        Dr. William L. Stanford, Ph.D.

32        The Ottawa Hospital, 501 Smyth Rd, Box 511, CCW 5206c

33        Ottawa, ON K1H 8L6, Canada

34        [wstanford@ohri.ca](mailto:wstanford@ohri.ca)

35  
36        **One Sentence Summary:** We performed a drug screen in 3D and discovered HDAC inhibitors  
37        exhibit therapeutic efficacy in models of the lung disease lymphangioliomyomatosis.

38 **ABSTRACT**

39           Lymphangiomyomatosis (LAM) is a rare disease involving cystic lung destruction by  
40 invasive LAM cells. These cells harbor loss-of-function mutations in *TSC2*, conferring  
41 constitutive mTORC1 signaling. Rapamycin is the only clinically approved disease-modifying  
42 treatment, but its action is cytostatic and disease progresses upon its withdrawal. There is a  
43 critical need to identify novel agents that prevent the invasive phenotype and/or eradicate the  
44 neoplastic LAM cells. Here, we employed novel cellular and extracellular models to screen for  
45 candidate therapeutics in a physiologically relevant setting. We observed that lung-mimetic  
46 hydrogel culture of pluripotent stem cell-derived diseased cells more faithfully recapitulates  
47 human LAM biology compared to conventional culture on two-dimensional tissue culture  
48 plastic. Leveraging our culture system, we conducted a three-dimensional drug screen using a  
49 custom 800-compound library, tracking cytotoxicity and invasion modulation phenotypes at the  
50 single cell level. We identified histone deacetylase (HDAC) inhibitors as a group of anti-invasive  
51 agents that are also selectively cytotoxic towards *TSC2*<sup>-/-</sup> cells. Unexpectedly, we observed that  
52 next generation ATP-competitive mTORC1/2 inhibitors potentiate invasion. We determined anti-  
53 invasive effects of HDAC inhibitors to be independent of genotype, while selective cell death is  
54 mTORC1-dependent and mediated by apoptosis. Drug performance was subsequently evaluated  
55 at the single cell level in zebrafish xenografts. We observed consistent therapeutic efficacy *in*  
56 *vivo* at equivalent concentrations to those used *in vitro*, substantiating HDAC inhibitors as  
57 potential therapeutic candidates for pursuit in patients with LAM.

## 58 INTRODUCTION

59 Lymphangiomyomatosis (LAM) is a cystic lung disease predominately affecting  
60 women, at a prevalence of 1 to 10 per million (1). LAM can occur sporadically or in association  
61 with the multisystem tumor-forming disorder, Tuberous Sclerosis Complex (TSC) (2). The  
62 pulmonary histopathology is characterized by microscopic nodules consisting of immature  
63 smooth muscle-like cells that express markers of neural crest lineages (3). These invading cells  
64 digest the lung parenchyma forming cystic lesions that lead to progressive respiratory decline  
65 and fatality if untreated (4–6). The molecular etiology of LAM involves loss-of-function  
66 mutations in the endogenous mTORC1 suppressor *TSC2*, thereby inducing hyperactivation of  
67 mTORC1 anabolic and tumorigenic signalling (7). The allosteric mTORC1-inhibitor rapamycin  
68 (clinically, sirolimus) slows disease progression and improves symptomatology (8–11). While  
69 clinical approval of rapamycin by the FDA in 2015 has led to a dramatic new frontier in the  
70 LAM therapeutic landscape, significant limitations exist. A subset of patients do not respond to  
71 treatment, and rapamycin is invariably cytostatic, with rapid disease progression upon treatment  
72 withdrawal (11, 12). There is a critical need to discover novel treatment strategies that can  
73 eradicate LAM cells.

74 A key step in the pathway to therapeutic development is the effective modelling of  
75 disease characteristics. In this domain, LAM has remained a challenge. Cultures of cells derived  
76 from human pulmonary LAM lesions grow as a heterogeneous mixture with rapid exhaustion of  
77 *TSC2*<sup>-/-</sup> cells, prohibiting the establishment of clonal primary cell lines (13). While a genome  
78 engineering strategy would seem straightforward for this monogenic disease, the cell-of-origin of  
79 LAM remains unknown, begging the question of which cell type to engineer. While we have  
80 demonstrated that *TSC2*<sup>-/-</sup> human pluripotent stem cell-derived neural crest cells model several

81 phenotypic features of LAM (14), neural crest cells consist of a diverse and plastic population  
82 that are not readily scalable for drug screening purposes. Animal models of LAM have been  
83 comparably challenging to establish, and none to date have recapitulated pathognomonic features  
84 such as histological premelanosome protein (PMEL) positivity and concomitant elevated serum  
85 levels of vascular endothelial growth factor D (VEGF-D) (15).

86 An emerging consideration in disease modelling is the contribution of the extracellular  
87 matrix (ECM) to disease biology. Water-swollen networks of polymers termed hydrogels have  
88 arisen as effective tools for mimicking salient elements of the native ECM while exhibiting  
89 mechanics similar to many soft tissues (16). Hydrogels can be broadly classified as either  
90 natural, synthetic, or hybrid materials. One such hybrid scaffold is hyaluronic acid, a naturally-  
91 sourced material that can be readily modified to independently tune ECM features of interest,  
92 such as elasticity, stiffness, and viscosity (17). A viscoelastic hydrogel with a derivatized  
93 hyaluronic acid backbone has been shown to permit the study of invasive properties of LAM  
94 cellular models in three-dimensional culture (18). Importantly, three-dimensional culture systems  
95 have been demonstrated as more predictive of *in vivo* drug responses compared to conventional  
96 culture on two-dimensional plastic (19, 20).

97 In recent years, there has been a resurgence of interest in phenotype-based screens for  
98 drug discovery compared to target-based approaches (21). An analysis of therapeutics approved  
99 between 1999 and 2008 revealed that 62% first-in-class drugs were discovered by phenotype-  
100 based screens, despite the fact that such screens represented only a small subset of the overall  
101 total (22). The apparent superiority of phenotype-based approaches may in part arise from the  
102 ability to identify compounds which exhibit a therapeutic effect by modulating multiple targets  
103 simultaneously (21). In addition, phenotypic drug screens can be multiplexed with counter-

104 screening, ensuring candidate therapeutics do not also confer undesirable side-effects, such as  
105 physiological toxicity. In the context of LAM, a monogenetic disease, this counter-screening  
106 takes shape by directly comparing *TSC2*<sup>-/-</sup> cells against matched wild type (WT) controls.

107         Here, we analyze a novel hydrogel culture system of pluripotent stem cell-derived  
108 models, and observe the cell type employed, genotype, and culture substrate all contribute to  
109 modelling features of LAM. We performed a three-dimensional drug screen, tracking  
110 cytotoxicity and invasion modulation phenotypes at the single cell level. We identified histone  
111 deacetylase (HDAC) inhibitors as anti-invasive and selectively cytotoxic towards *TSC2*<sup>-/-</sup> cells.  
112 Importantly, we observed consistent therapeutic efficacy upon xenotransplantation of human cell  
113 models into zebrafish larvae, highlighting HDAC inhibitors as potential therapeutic candidates  
114 for pursuit in patients.

## 115 **RESULTS**

### 116 **Stem cell-derived models exhibit features of LAM, independent of genotype**

117 As pulmonary LAM cells are not amenable to expansion upon lesion explant, (13) we  
118 established primary cell lines by *in vivo* differentiation of human pluripotent stem cells (hPSCs),  
119 as previously described (23). Briefly, hPSCs were injected into NOD.Cg-Prkdc<sup>scid</sup> Il2rg<sup>tm1Wjl</sup>/SzJ  
120 (NSG) immunodeficient mice to form teratomas, which were explanted and expanded in smooth  
121 muscle-cell enriching conditions (Fig. S1A). We used a previously reported isogenic pair of  
122 female mCherry<sup>+</sup> WT and genome-engineered *TSC2*<sup>-/-</sup> hPSCs (14). Cell cultures exhibit a  
123 predominately spindle cell morphology and express  $\alpha$ -smooth muscle actin (ACTA2) protein in  
124 all isolated cells (Fig. 1A, Fig. S1B). Further, immunofluorescence analysis identified a small  
125 fraction of PMEL<sup>+</sup> cells (~0.13%), a hallmark marker of pulmonary LAM (Fig. 1A, Fig. S1C).  
126 The high fraction of ACTA2<sup>+</sup> and low fraction of PMEL<sup>+</sup> cells in culture is consistent with the  
127 relative abundance of these markers in heterogenous human LAM lesions (3). Notably, the  
128 percentage of PMEL<sup>+</sup> and ACTA2<sup>+</sup> cells did not vary between WT and *TSC2*<sup>-/-</sup> (Fig. S1B-C).  
129 Secreted VEGF-D, a critical biochemical biomarker used in the diagnosis of LAM, was detected  
130 in the supernatant of both WT and *TSC2*<sup>-/-</sup> cultures and was insensitive to acute rapamycin  
131 treatment (Fig. 1B). Together, these data suggest the cell models employed exhibit features of  
132 LAM as a product of the cell type isolated, independent of genotype.

133

### 134 **Three-dimensional hydrogel culture enables study of the LAM invasive phenotype at single** 135 **cell resolution**

136 We next sought to model the pulmonary invasive phenotype of LAM cells by adapting a  
137 lung-mimetic hydrogel culture system (18). The hydrogel is synthesized by crosslinking

138 hyaluronic acid strands with matrix metalloprotease (MMP)-cleavable peptides, while  
139 embedding vitronectin peptides and methylcellulose to increase cell adhesion and matrix  
140 plasticity, respectively. Cells are plated on top of the synthesized hydrogel and actively invade  
141 through the material (Fig. 1C-D, Supplementary Movies 1-2). By staining with a nuclear dye and  
142 acquiring multiplanar images through the optically clear hydrogel, we identify every cell in XYZ  
143 planes and compute invasion distances at single cell resolution (Fig. S1D).

144 We observed all cells from both WT and *TSC2*<sup>-/-</sup> cultures to invade through the hydrogel,  
145 albeit at variable distances (Fig. 1E). On average, WT cultures invaded further than *TSC2*<sup>-/-</sup> in a  
146 manner insensitive to acute rapamycin treatment (Fig. 1F). We posited that differing invasion  
147 distances of cells in the same culture reflect a cell autonomous property, rather than a reflection  
148 of stochasticity. To test this, we isolated and expanded clones from WT and *TSC2*<sup>-/-</sup> bulk cultures  
149 and subjected these clones to hydrogel culture. We observed a subset of clones with dramatically  
150 high invasion speeds, and likewise, a subset with slow invasion speeds (Fig. S1E). These data  
151 suggest differential cell autonomous capacities for invasion in putative heterogenous cultures.  
152 Finally, we investigated modes of invasion employed by LAM cell models in this hydrogel  
153 system. Similar to previous findings (18), we observed a decrease in invasion upon treatment  
154 with the pan-MMP inhibitor GM6001 or the Rho-kinase (ROCK) inhibitor Y27632, indicating  
155 both protease-dependent and independent modes of invasion employed (Fig. 1G).

156

### 157 **Loss of *TSC2* and hydrogel culture both confer transcriptomic features of LAM**

158 To profile our cell culture system more comprehensively, we conducted bulk RNA-seq of  
159 WT and *TSC2*<sup>-/-</sup> cells, in the presence or absence of rapamycin, and in both plastic and hydrogel  
160 culture, for a total of 8 sample conditions (Fig. 1H). Principal components analysis (PCA)

161 revealed sample genotype to be driving the primary axis of variation, and culture substrate to be  
162 driving the secondary axis of variation (Fig. 1I). Rapamycin treatment induced a substantial  
163 global transcriptomic change in the *TSC2*<sup>-/-</sup> cells, inducing a profile more similar to WT cells  
164 (Fig. 1I).

165 We conducted differential expression analysis comparing across genotype (*TSC2*<sup>-/-</sup> vs.  
166 WT) and culture substrate (hydrogel vs. plastic) in untreated samples, while holding the  
167 reciprocal covariate constant. At a false discovery rate (FDR) < 0.05, we identified 6,317  
168 differentially expressed genes (DEGs, 1,793 with  $|\log_2FC| > 1$ ) between WT and *TSC2*<sup>-/-</sup>, and  
169 4,432 DEGs (771 with  $|\log_2FC| > 1$ ) between plastic and hydrogel (Table S1A-B, Fig. S1F-G).  
170 While exhibiting some overlap, these DEG lists were largely distinct (Fig. S1H). We found  
171 78.8% of the DEGs distinguishing genotype to be reversed by rapamycin treatment, suggesting  
172 mTORC1-dependency (Fig. 1J, left panel). In contrast, the expression of DEGs distinguishing  
173 plastic versus hydrogel cultures remained largely unchanged in the presence of rapamycin (Fig.  
174 1J, right panel). We next examined the overlap of these DEGs with a recently published LAM  
175 gene signature derived from single cell RNA-seq profiling of primary lesions (24). We observed  
176 that both DEG lists overlap substantially (65.8% of the total 760 LAM genes) and share both  
177 common and distinct genes with the LAM gene signature (Fig. 1K).

178 To glean further biological insight, we conducted GO term enrichment (Table S2A-B,  
179 Fig. S1I-J). Both DEG lists ranked “extracellular matrix organization” as most highly enriched,  
180 which is also the top enriched term in a primary LAM lesion gene signature list (24). The DEGs  
181 distinguishing genotype were also enriched in many terms related to development, similar to  
182 primary LAM lesions (24). Interestingly, the DEGs distinguishing culture substrates were largely  
183 enriched in terms related to proliferation (Table S1B, Fig. S1J). LAM is an indolent disease



184 which progresses at a slow pace relative to other invasive diseases; only a small fraction of cells  
185 actively proliferative in primary LAM lesions (3). On plastic, we found LAM cell models  
186 proliferated rapidly, with ~30% of cells incorporating EdU after a short 3-hour pulse (Fig. 1L).  
187 In contrast, *TSC2*<sup>-/-</sup> cells proliferated at a slightly slower pace, consistent with previous studies of  
188 loss of *TSC2* in primary cells (25). Acute rapamycin treatment reduced proliferation of *TSC2*<sup>-/-</sup>  
189 cells but did not have a detectable effect on WT cultures. However, subjecting cells to hydrogel  
190 culture caused a dramatic decrease in cell proliferation (Fig. 1L), likely reflective of the  
191 proliferation-invasion dichotomy (26). Together, these data suggest both genotype (loss of *TSC2*)  
192 and culture substrate (3D hydrogel) induce transcriptomic landscapes which model LAM  
193 features.

194

#### 195 **Hydrogel culture potentiates differential mTORC1-signalling between WT and *TSC2*<sup>-/-</sup> cells**

196 mTORC1 hyperactivation is a hallmark feature of primary LAM lesions compared to  
197 normal adjacent WT tissue. To assess mTORC1 signalling status, we performed a low input  
198 western blot, probing for downstream mTORC1 effectors pS6RP and p4E-BP1. Culturing cells  
199 on plastic (2D) showed marginal differences in mTORC1 signalling between WT and *TSC2*<sup>-/-</sup>  
200 cells, and both cell types demonstrated activation of mTORC1 above rapamycin-treated levels  
201 (Fig. 2A). Remarkably, culturing on hydrogel potentiated a dramatic difference in mTORC1  
202 signalling, with WT cells downregulating activity to rapamycin-treated levels and *TSC2*<sup>-/-</sup> cells  
203 upregulating signalling above levels seen on plastic alone. This is consistent with the PCA of  
204 transcriptomic landscapes, whereby WT untreated and WT rapamycin-treated samples from  
205 hydrogel culture cluster slightly more closely compared to plastic culture (Fig. 1I). To  
206 corroborate these findings at the single cell level, we examined mTORC1 signalling by

207 immunofluorescence (Fig. 2B, S2A). While a small difference in mTORC1 signalling was  
208 observed between WT and *TSC2*<sup>-/-</sup> cells cultured on plastic, this difference was potentiated in 3D  
209 hydrogel culture. Importantly, mTORC1 signalling in WT cells was seen to mirror rapamycin-  
210 treated levels only when cultured on hydrogel.

211 We sought to further explore the genotype-selective changes induced by hydrogel culture  
212 by interrogation of our bulk RNA-seq dataset. To do so, we tested for genes with a significant  
213 coefficient fit to the genotype:substrate interaction term (See Supplementary Materials and  
214 Methods) and identified 761 DEGs at FDR < 0.05 (Table S1C). Network analysis of GO terms  
215 enriched in this DEG list revealed two principal nodes, one related to sterol synthesis and the  
216 other to ribonucleotide metabolism (Fig. 2C, Table S2C). Notably, both these metabolic  
217 pathways have been associated with mTORC1 activity (27).

218 To unearth mTORC1-dependent transcriptomic alterations between WT and *TSC2*<sup>-/-</sup> that  
219 differ between plastic and hydrogel culture, we clustered the 761 DEGs based on their  
220 expression pattern across the 8 experimental conditions (Fig. S2B). Strikingly, genes related to  
221 sterol synthesis and ribonucleotide metabolism partitioned largely into two distinct clusters (Fig.  
222 S2B). We next classified each gene cluster into one of three categories based on the magnitude  
223 of expression differences between WT and *TSC2*<sup>-/-</sup>, and whether the expression changes were  
224 rescued by rapamycin (Fig. S2C). Remarkably, we find that 69% of the 761 DEGs showed a  
225 greater (or a unique) difference between WT and *TSC2*<sup>-/-</sup> cells in hydrogel culture compared to  
226 plastic, which was rescued by rapamycin (Fig. 2D). Together, these results demonstrate that  
227 hydrogel culture potentiates differential mTORC1 signalling between WT and *TSC2*<sup>-/-</sup> cells,  
228 reinforcing a physiologically relevant environment in which mTORC1-dependent phenotypes  
229 can be identified.

230

231 **Three-dimensional drug screen identifies compounds that modulate invasion and cell**  
232 **viability**

233 We next employed our hydrogel culture system to identify potential therapeutic  
234 compounds. Cell death was measured at the single cell level by application of the live cell  
235 imaging fluorophore SyTOX, which selectively permeates cells with compromised plasma  
236 membrane integrity. We first tested a known cytotoxic compound, the proteasome inhibitor  
237 carfilzomib, and identified substantial cell death by live cell imaging (Fig. 3A, S3A).  
238 Additionally, we confirmed the ability to detect invasion modulation effects at the single cell  
239 level by employing the known anti-invasion Src kinase inhibitor dasatinib (Fig. 3B, S3B). To  
240 achieve the throughput necessary for a therapeutic screen, we acquired live cell images by high  
241 content microscopy paired with automated image analysis tools developed in house. We  
242 calculated the drug screen  $Z'$  (a metric for assay quality) to be 0.873 for cytotoxicity  
243 measurements and 0.533 for invasion modulation. We subsequently screened a curated library of  
244 800 structurally diverse, bioactive, membrane-penetrant compounds (Fig. 3C, Table S3A). Of  
245 these compounds, 39% have been trialed and shown to be safe for use in humans. We tested each  
246 compound on both WT and *TSC2*<sup>-/-</sup> cells in the presence and absence of rapamycin to elucidate  
247 mTORC1-dependency.

248 We found a wide variety of compounds with invasion modulatory and cytotoxic  
249 capabilities (Table S3B-C). Unsurprisingly, highly cytotoxic compounds also led to a reduction  
250 in bulk invasion (Fig. 3D). This trend was independent of genotype and rapamycin treatment  
251 (Fig. S3C). However, we observed many compounds which conferred an anti-invasive effect in  
252 the absence of detectable cytotoxicity (Fig. 3D, S3C). We next computed therapeutic invasion  $z$ -

253 scores (i.e., statistical measure of compound effect size) by comparing against the vehicle control  
254 invasion distribution. Remarkably, while we identified several anti-invasive compounds,  
255 numerous compounds significantly increased invasion (Fig. 3E-F), a phenotype that would be  
256 otherwise overlooked if screening on two-dimensional plastic and could lead to severe adverse  
257 consequences in the clinical setting. In general, more compounds in this library were identified to  
258 significantly attenuate rather than potentiate invasion (Fig. 3F). Importantly, we observed a  
259 substantial overlap in the compounds identified to be anti-invasive across genotypes and  
260 treatment conditions, with very few drugs demonstrating a genotype-selective block to invasion  
261 (Fig. 3G, S3D). Together, these data demonstrate the identification of a collection of compounds  
262 which block invasion in these cell populations, irrespective of *TSC2* genotype.

263         A key goal in the therapeutic development landscape for LAM is the identification of  
264 compounds which exert selective cytotoxicity towards *TSC2*<sup>-/-</sup> cells. Interestingly, we observed  
265 that *TSC2*<sup>-/-</sup> cells exhibited pan-compound resistance, with over 7-fold more compounds  
266 demonstrating significant cytotoxicity towards WT compared to *TSC2*<sup>-/-</sup> cells (Fig. 3H). This  
267 selectivity is reduced to half with the addition of rapamycin, suggesting generalized resistance is  
268 largely due to mTORC1 hyperactivation in *TSC2*<sup>-/-</sup> cells. (Fig. 3H). We compared the list of  
269 compounds that are selectively cytotoxic towards *TSC2*<sup>-/-</sup> cells in the presence versus absence of  
270 rapamycin, and observed only a 15% overlap, indicating therapeutic vulnerabilities vary  
271 depending on mTORC1 signalling activity (Fig. 3I). In summary, we identified a suite of anti-  
272 invasive and selectively cytotoxic therapeutics which can be mined for further development in  
273 LAM (Table S3B-C).

274

275 **Enrichment analysis predicts HDAC inhibitors as anti-invasive and selectively cytotoxic**  
276 **towards *TSC2*<sup>-/-</sup> cells**

277 To refine our small molecule list for further investigation, we sought to identify  
278 outperforming compounds which modulate targets of the same class. Using the known annotated  
279 targets of the employed compounds, we performed target enrichment analysis by adapting the  
280 Gene Set Enrichment Analysis (GSEA) algorithm. We identified targets conferring well-  
281 established selective cytotoxicity towards *TSC2*<sup>-/-</sup> and anti-invasive classes, including  
282 proteasome inhibition (cytotoxicity) and Src and Rho kinase inhibition (anti-invasive) (Fig. S3E-  
283 F, Table S4A-D). Of note, Src inhibition, a therapeutic route explored in LAM, was found to be  
284 selectively cytotoxic towards WT cells (Fig. S3E). Remarkably, pan-HDAC inhibition was  
285 observed to be the only class in the top 10 most significant annotations for selective cytotoxicity  
286 towards *TSC2*<sup>-/-</sup> and generalized anti-invasion. We note a substantial favourable enrichment of  
287 HDAC-targeting compounds by both metrics, however, not all compounds annotated to inhibit  
288 HDACs performed favourably (Fig 3J).

289 A limiting factor to our analyses was the small number of compounds which were  
290 identified to selectively eliminate *TSC2*<sup>-/-</sup> cells. We sought to extend our compound list *in silico*  
291 using a structure-based approach with a mechanism of action prediction algorithm (Elion<sup>TM</sup>). In  
292 brief, chemical features are extracted from compound structures and matched with screen  
293 performance values to train a machine learning algorithm for prediction of other possibly  
294 efficacious compounds. Compounds predicted to be efficacious *in silico* are then analyzed by  
295 target enrichment and pathway analysis. Using this approach, we corroborated HDACs as highly  
296 enriched targets for both selective cytotoxicity and anti-invasion (Table S5A-B). GO term  
297 analysis on significant targets identifies nearly all top predicted pathways relate to deacetylation

298 activity, for both selective cytotoxicity and anti-invasion (Fig. 3K, Table S5C-D). These data  
299 together highlighted HDAC inhibitors as promising therapeutics which we explored further and  
300 present herein.

301

302 **HDAC inhibitors are selectively cytotoxic towards *TSC2*<sup>-/-</sup> cells exclusively in hydrogel**  
303 **culture**

304 We further tested 11 HDAC inhibitors from our compound library at a wider range of  
305 concentrations and identified three to be selectively cytotoxic towards *TSC2*<sup>-/-</sup> cells: SAHA  
306 (clinically, Vorinostat), SB939 (Pracinostat), and LBH589 (Panobinostat), all of which are pan-  
307 HDAC inhibitors (Fig. 4A). We note the atypical therapeutic dose-response curves and  
308 selectivity, demonstrating marginal differences in IC<sub>50</sub> *per se* but substantial variation in  
309 maximal toxicity (Fig. 4B). Selective cytotoxicity was largely reversed by co-treatment with  
310 rapamycin, suggesting mTORC1-dependency. Importantly, the magnitude of cytotoxic  
311 selectivity between WT and *TSC2*<sup>-/-</sup> cells increased with treatment duration (Fig. S4A). We  
312 corroborated selective cell death functionally via clonogenic assays (Fig. S4B). Remarkably,  
313 when these HDAC inhibitors were tested with cells cultured on plastic, we did not observe any  
314 genotype-selectivity in their cytotoxic profile (Fig. 4A-B). In addition, inhibitor profiles  
315 employed in plastic culture did not change in the presence of rapamycin, suggesting a loss of  
316 mTORC1-dependency for cytotoxic effects (Fig. 4A-B). While HDAC inhibitors did modulate  
317 the proliferation of cells in hydrogel culture, a substantial proliferation blockade was exerted  
318 when cells were cultured on plastic, in both genotypes (Fig. S4C). Together, these data indicate a  
319 striking difference in cellular responses to HDAC inhibitor treatment while cultured on plastic  
320 versus hydrogel. Importantly, HDAC inhibitors only demonstrate mTORC1-dependent selective

321 toxicity towards *TSC2*<sup>-/-</sup> cells while treated in hydrogel culture. These data are consistent with  
322 observation of hydrogel culture potentiating differential mTORC1 signalling between WT and  
323 *TSC2*<sup>-/-</sup> cells (Fig. 2, S2).

324

### 325 **HDAC inhibitors induce cell death via apoptosis**

326 We next sought to probe the mode of cell death induced by HDAC inhibitors. Previous  
327 studies have provided evidence for both HDAC inhibitor-mediated apoptosis as well as  
328 autophagic cell death (28). Considering we observed a reduction in cell death when co-treated  
329 with rapamycin, a potent inducer of autophagy, we hypothesized the predominant cell death  
330 mode to be apoptosis. To test this postulation, we employed live cell apoptosis imaging reagents,  
331 including cleaved caspase 3 (CASP3) and Annexin V. We validated their activity in our hydrogel  
332 culture using staurosporine, a known inducer of apoptosis (Fig. S4D-E). For all three HDAC  
333 inhibitors, we observed temporal accumulation of Annexin V and cleaved CASP3 with treatment  
334 duration in hydrogel (Fig. 4C-D, S4F). Importantly, we discerned a complete rescue of cell death  
335 by co-treatment with the caspase inhibitor Z-VAD (OMe)-FMK (Fig. 4E, S4G). Together, these  
336 data demonstrate the employed HDAC inhibitors induce apoptotic cell death in hydrogel culture.

337

### 338 **HDAC inhibitors are anti-invasive, independent of cytotoxic effects**

339 To separate the anti-invasive effects from cytotoxic effects of these HDAC inhibitors, we  
340 identified and computationally removed SyTOX<sup>+</sup> cells from invasion calculations (Fig. S5A).  
341 We determined all three HDAC inhibitors exhibited a dose-dependent anti-invasion effect on  
342 SyTOX<sup>-</sup> cells (Fig. 5A-B). HDAC inhibitors exerted anti-invasive effects on both WT and *TSC2*<sup>-/-</sup>  
343 <sup>-/-</sup> cells in the presence or absence of rapamycin. (Fig 5A-B, S5B-C). Of note, the effect size was

344 generally larger in the *TSC2*<sup>-/-</sup> cells, and LBH589 demonstrated a trend towards reduced invasion  
345 that was not statistically significant. Remarkably, of the 11 HDAC inhibitors we tested, eight  
346 demonstrated anti-invasive effects in a dose-dependent manner (Fig. S5D). When aggregated as  
347 a class of therapeutics, there is a clear increase in anti-invasive effects with escalating doses,  
348 independent of cytotoxicity (Fig. 5C). Together, these data demonstrate HDAC inhibitors are  
349 effective anti-invasive agents independent of their cytotoxic profile.

350

### 351 **ATP-competitive mTORC1/2 inhibitors potentiate cell invasion**

352 A surprising result of our 3D drug screen is the classification of ATP-competitive  
353 mTORC1/2 inhibitors as invasion potentiators (Fig. S3F). We interrogated this further due to its  
354 clinical relevance, as ATP-competitive inhibitors are in active development for a wide range of  
355 hyperactive mTOR conditions (29). Across a five-point dose-response curve, we observed an  
356 increase in invasion from three distinct mTORC1/2 inhibitors, independent of cytotoxic effects  
357 (Fig. 5D-E). Invasion potentiation was observed in both WT and *TSC2*<sup>-/-</sup> cells in the presence or  
358 absence of rapamycin (Fig. 5D-E, S5E-F). The extent of invasion potentiation varied across  
359 conditions: WT cells exhibited a greater increase in invasion compared to *TSC2*<sup>-/-</sup>, and the effect  
360 was exaggerated in both genotypes by co-treatment with rapamycin (Fig. S5G). Aggregating the  
361 effects of all three mTOR inhibitors showed a dose-dependent potentiation of invasion for this  
362 class of compounds (Fig. 5F). Together, these data demonstrate ATP-competitive inhibition of  
363 mTORC1/2 increases cell invasion.

364

### 365 **Xenotransplantation of LAM cell models into zebrafish larvae permits dynamic tracking of** 366 **cell invasion**



367 We next sought to evaluate the *in vivo* efficacy of the HDAC inhibitors SAHA, SB939,  
368 and LBH589. Consistent with previous findings, we found that loss of *TSC2* alone was  
369 insufficient to confer tumorigenicity upon subcutaneous xenotransplantation in immunodeficient  
370 mice (Fig. S6A). To avoid immortalization of our cell models- a process which dramatically  
371 alters cellular characteristics- we performed a well-established xenotransplantation assay in  
372 zebrafish larvae (31, 32). In this system, WT or *TSC2*<sup>-/-</sup> cells are injected into the hindbrain  
373 ventricle of zebrafish larvae 3 days post-fertilization, imaged 1 day post-injection (dpi) to ensure  
374 successful engraftment, and then imaged again at 4 dpi to visualize local invasion (Fig. 6A-B).  
375 Cells were tracked by their endogenous mCherry expression (14). The optical clarity of this  
376 system provides the advantage of enabling isogenic comparisons between WT and *TSC2*<sup>-/-</sup>  
377 human cells *in vivo* while dynamically tracking cell invasion.

378 To quantify invasion in an unbiased fashion, we computed the ratio of mCherry signal  
379 found outside the injection site compared to within (Fig. S6B-C). Using this method, we  
380 accurately detect near zero invasion scores 1 dpi, followed by a substantial increase 4 dpi (Fig.  
381 6C). We observed comparable invasion scores between WT and *TSC2*<sup>-/-</sup> cells which were  
382 unaffected by rapamycin treatment, consistent with *in vitro* data (Fig. 6D). To quantify human  
383 cell proliferation and cell death, we digested and pooled whole larvae (15 - 20 per condition)  
384 followed by flow cytometry analysis, probing for mCherry and human-specific CASP3.  
385 Consistent with xenotransplantation in mice, these cells were not tumorigenic and the rate of  
386 clearance outstripped proliferation (Fig. S6D). The number of cells at 4 dpi was comparable  
387 between genotypes and unaffected by rapamycin treatment (Fig. 6E). The percentage of CASP3<sup>+</sup>  
388 cells in the mCherry<sup>+</sup> population was ~10% and equivalent across conditions, similar to baseline  
389 cell death rates seen in hydrogel culture (Fig. 3A, 6F).

390

391 **HDAC inhibitors SAHA and SB939 block cell invasion and selectively eradicate *TSC2*<sup>-/-</sup>**  
392 **cells *in vivo***

393 We next employed our zebrafish xenograft system to assess the efficacy of HDAC  
394 inhibitors *in vivo*. To achieve the highest quality of pre-clinical evidence, experiments were  
395 conducted in a randomized, double-blinded, placebo-controlled fashion. We first established  
396 dose-toxicity profiles for each HDAC inhibitor: SB939 and LBH589 conferred an IC<sub>50</sub> of 53.1  
397 μM and 6.74 μM respectively, while the favourable toxicity profile of SAHA precluded  
398 calculation of an IC<sub>50</sub> value (Fig. S6E). Of note, *in vivo* HDAC inhibitor potency correlated with  
399 the *in vitro* cytotoxicity profile. Zebrafish engrafted with either WT or *TSC2*<sup>-/-</sup> cells were treated  
400 with HDAC inhibitors by immersion therapy, in the presence or absence of rapamycin.  
401 Importantly, we used the same compound concentration as those employed *in vitro*, which was  
402 well below each compound's IC<sub>50</sub> value.

403 After three days of treatment, we observed that SAHA and SB939 exerted a statistically  
404 significant anti-invasive effect in the absence of rapamycin, exclusively on the *TSC2*<sup>-/-</sup> cells (Fig.  
405 6G). SB939 also demonstrated a statistically significant anti-invasive effect in the presence of  
406 rapamycin. We note that live cells could not be distinguished from dead or dying cells in this  
407 quantification. However, by flow cytometry we observed an increase in the percentage of human  
408 *TSC2*<sup>-/-</sup> cells to be CASP3<sup>+</sup> upon treatment with SAHA and SB939 (Fig. 6H) This effect was  
409 abrogated upon combination treatment with rapamycin and was not observed in the human WT  
410 cells. Together, these data indicate the HDAC inhibitors SAHA and SB939 exhibit *in vivo* anti-  
411 invasion and selective cytotoxicity effects towards *TSC2*<sup>-/-</sup> cells.

## 412 **DISCUSSION**

413           Here, we subject novel tissue-engineered models of LAM to a three-dimensional drug  
414 screen to detect physiologically relevant therapeutics. We identified HDAC inhibitors as anti-  
415 invasive and selectively cytotoxic towards *TSC2*<sup>-/-</sup> cells, both *in vitro* and *in vivo*. In contrast, the  
416 gold standard therapeutic agent for LAM patients, rapamycin, did not exhibit any cytotoxic or  
417 anti-invasive effects. To our knowledge, this is the first high content compound screen to  
418 simultaneously track invasion modulation and cytotoxicity at the single cell level. Importantly,  
419 we report the first zebrafish xenotransplantation system using LAM-like cells, extending  
420 parametrization of therapeutic effects at the single cell level *in vivo* while comparing WT versus  
421 *TSC2*<sup>-/-</sup> cells.

422           Our research identifies pan-HDAC inhibitors as potential therapeutic candidates for  
423 pursuit in LAM patients. Notably, the selective cytotoxic effect towards *TSC2*<sup>-/-</sup> cells was only  
424 observed in hydrogel culture and would have otherwise been missed using standard screening in  
425 2D tissue culture plastic (Fig. 4A-B). This finding complements a recent study evidencing  
426 therapeutic efficacy of HDAC inhibitors in a *Tsc1*<sup>-/-</sup>-driven mouse model of lymphangiosarcoma  
427 (33). HDAC inhibitors present an opportune class of molecules for pursuit due to the wide  
428 variety of compounds already approved for clinical use. Indeed, both SAHA and LBH589 are  
429 approved for use in cutaneous T cell lymphoma and multiple myeloma, respectively (34, 35).  
430 The safe-in-human toxicity profile of these compounds will facilitate rapid translation for testing  
431 in LAM patients. Importantly, our employed HDAC inhibitors exhibit selective cytotoxicity in  
432 an mTORC1-dependent manner, suggesting generalizable efficacy to mTORC1-driven  
433 malignancies. Of note, cutaneous T cell lymphoma cells have been observed to exhibit mTORC1  
434 hyperactivation compared to matched normal controls (36).

435           In this work, we used equivalent HDAC inhibitor concentrations for *in vitro* and *in vivo*  
436 experiments; these concentrations were well-below dose-limiting toxicities in zebrafish (Fig.  
437 S6E). However, a critical outstanding question is whether the concentrations employed are  
438 physiologically attainable in humans. Pharmacokinetic studies of SAHA, SB939, and LBH589 in  
439 humans have demonstrated micromolar serum concentrations are achievable (37–39). In fact, the  
440 original pre-clinical work which formed the foundation for testing SAHA as a treatment in  
441 cutaneous T cell lymphoma used the drug *in vitro* at micromolar concentrations (40). Thus, we  
442 anticipate drug concentrations necessary to elicit a therapeutic effect are achievable in patients  
443 with LAM. We note that while LBH589 demonstrated a therapeutic effect *in vitro*, drug efficacy  
444 was not maintained upon *in vivo* testing, possibly due to altered bioavailability in the zebrafish.  
445 While SAHA and SB939 demonstrated *in vivo* efficacy, the majority of parameters assessed  
446 demonstrated mTORC1-dependency, similar to *in vitro*. Many LAM patients are on a chronic  
447 regime of rapamycin; thus, it is likely that clinical trials would require short-term withdrawal of  
448 rapamycin and acute treatment with HDAC inhibitors to elicit a therapeutic effect. Alternatively,  
449 these therapeutics may provide a benefit for LAM patients who are not currently treated with  
450 rapamycin, whether due to mild disease, intolerance, or resistance.

451           Our three-dimensional screening approach permitted the identification of many  
452 compounds with invasion modulatory capabilities. We encourage further mining of these data to  
453 uncover additional novel classes of therapeutics which modulate invasion and/or exert selectivity  
454 cytotoxic effects (Table S3B-C). As one example, we identified ATP-competitive inhibitors of  
455 mTOR to increase cellular invasion (Fig. 5D-F, S5E-G). This is of clinical significance and  
456 requires further investigation, considering this class of therapeutics is undergoing investigation in  
457 a broad range of oncogenic conditions (29).

458           Throughout our study, we note both genotype (loss of *TSC2*) and culture substrate (3D  
459 hydrogel) contribute to modelling features of LAM. Importantly, hydrogel culture potentiated  
460 differential mTORC1-signalling between WT and *TSC2*<sup>-/-</sup> cells, reinforcing a physiologically  
461 relevant environment in which mTORC1-dependent phenotypes can be identified (Fig 2, S2).  
462 However, we also note a variety of LAM features in our cellular models that exist independently  
463 from loss of *TSC2*. For example, cells isolated from both WT and *TSC2*<sup>-/-</sup> teratomas are equally  
464 invasive, present matching ACTA2<sup>+</sup>/PMEL<sup>+</sup> profiles, and secrete similar levels of VEGF-D.  
465 Indeed, similar observations of LAM features in WT cells have been noted in a neural crest cell  
466 model (14). These data suggest perhaps, while loss of *TSC2* is critical for disease pathogenesis,  
467 the hallmark features of the putative “LAM cell” may already exist in a physiological, if not  
468 transient, context (e.g., during development, injury repair and inflammation). Critical  
469 consideration of the cell context is essential, even while employing isogenic comparisons, as  
470 different cell types exhibit distinct therapeutic vulnerabilities (14).

471           In summary, we have identified HDAC inhibitors as anti-invasive and selectively  
472 cytotoxic towards *TSC2*<sup>-/-</sup> cells *in vitro* and *in vivo*. While we have investigated three pan-HDAC  
473 inhibitors as potential candidates, our data points towards SAHA as the most efficacious against  
474 *TSC2*<sup>-/-</sup> cells while possessing the most favourable toxicity profile. On the path towards clinical  
475 translation, we anticipate testing of these compounds in diverse disease models. By validating  
476 compounds with orthogonal tools and techniques, we may elevate the most promising  
477 therapeutic for clinical trials.

## 478 MATERIALS AND METHODS

### 479 Study design

480 The objective of this research was to assess the LAM disease modelling capabilities of  
481 newly developed tissue-engineered cell models, and subsequently employ these models to  
482 identify novel therapeutic compounds. We conducted a 3D drug screen, and based on the  
483 acquired data, formulated and tested the following hypothesis: HDAC inhibitors are anti-invasive  
484 and selectively cytotoxic towards *TSC2*<sup>-/-</sup> cells. We employed a combination of *in vitro* and *in*  
485 *vivo* tools to test this hypothesis. Drug screen data was analyzed in a blinded, unbiased manner,  
486 and independently by two different researchers using distinct methods. Animal studies were  
487 conducted and analyzed in a double-blinded, randomized, placebo-controlled manner to generate  
488 the highest quality pre-clinical evidence. Blinding was achieved by codification of an  
489 investigator uninvolved in the experiments performed. A variety of experimental tools were  
490 employed to interrogate this hypothesis, described in subsequent Methods and in the  
491 Supplementary Materials and Methods. All reagents used and concentrations employed (if  
492 relevant) are reported in Supplementary Materials and Methods.

493 Sample sizes for both *in vitro* and *in vivo* studies were determined according to field-  
494 specific conventions. Power analysis was not employed. Data collection was not stopped  
495 prematurely, and every experimental replicate was analyzed. All data points were included in the  
496 data presentation; outliers were only excluded if there was definitive empirical evidence of  
497 technical error and noted as such in the figure legend. Experiments were repeated at least three  
498 times unless otherwise noted, with replicates collected at separate points in time and under  
499 independent conditions. RNA-seq data is accessible at the Gene Expression Omnibus (GEO)  
500 repository with accession GSE179044.

501

## 502 **Cell derivation and maintenance culture**

503 LAM cell models were established via a previously reported *in vivo* differentiation  
504 protocol of human pluripotent stem cells (23). Briefly, we injected hPSCs into NSG mice to form  
505 teratomas, which were then explanted and expanded in smooth muscle-cell enriching conditions  
506 (Fig. S1A). We used a previously reported pair of mCherry<sup>+</sup> WT and genome-engineered *TSC2*<sup>-/-</sup>  
507 hPSCs for establishment of isogenic lines (14). Maintenance cultures were propagated on plastic  
508 containing a thin layer of Matrigel at 37°C, 5% CO<sub>2</sub>. hPSCs were cultured in Essential 8 medium  
509 and passaged in clumps by EDTA incubation, followed by cell scraping and wide-pore pipette  
510 transfer. LAM cells were cultured on Matrigel in Medium 231 containing Smooth Muscle  
511 Growth Supplement and passaged by 0.05% Trypsin as single cell suspensions.

512

## 513 **Hydrogel culture**

514 Hydrogel culture was conducted according to a previously established protocol (18).  
515 Briefly, a hyaluronic acid polymer backbone was derivatized with methylfuran motifs  
516 (confirmed by <sup>1</sup>H NMR) and conjugated to bismaleimide-terminated vitronectin and collagen-I-  
517 derived peptides, synthesized in house. Hydrogel viscoelasticity was increased by incorporation  
518 of methylcellulose derivatized with reactive thiol groups. Chemically synthesized hydrogel  
519 components were mixed and directly added to culture plates (384-well format) to gel at 37°C for  
520 3 hours. Following gelation, wells were hydrated with PBS and then subjected to three media  
521 washes interspaced with incubations at 37°C for 45 mins. LAM cells were then dissociated,  
522 added to plates containing hydrogel, and centrifuged for 3 min. at 10g to achieve immediate  
523 contact with the hydrogel.

524

## 525 **Cell treatments and live cell staining**

526 All compound treatments were conducted for 72 hours unless otherwise stated. See  
527 Supplementary Materials and Methods for 3D screen design, implementation, and analysis. Live  
528 cell imaging dyes (Hoechst, SyTOX, Annexin V, Cleaved Caspase 3) were incubated for 30 min.  
529 prior to imaging. Dyes were added as 10X concentrates in PBS; Annexin V diluent also  
530 contained 2.5mM CaCl<sub>2</sub>. To avoid cell detachment in the miniaturized well format, live imaging  
531 dyes were not washed prior to imaging; this did not impact image acquisition as dyes are  
532 minimally fluorescent unless bound to the target molecule.

533

## 534 **Microscopy**

535 We employed a high content imager (Thermo Fisher Scientific, Arrayscan VTI) to  
536 acquire multi-well and multi-planar images. Whole-well images (384-well plate format) of cells  
537 invading through hydrogel, stained with live cell dyes, were acquired by widefield microscopy  
538 with 40µm interval z-stacks. Unstained cells were imaged using a brightfield module. Tiled  
539 images of cells grown and stained on plastic were also acquired by high content widefield  
540 microscopy. Rodent subcutaneous xenografts were visualized by *in vivo* imaging (PerkinElmer,  
541 IVIS®). Zebrafish larvae xenografts were imaged by epifluorescence widefield microscopy  
542 (Zeiss, AxioObserver 7). Image analysis methods are reported in Supplementary Materials and  
543 Methods.

544

## 545 **Animal studies**



546 All animal experiments were conducted with approval from the University of Ottawa  
547 Animal Care Committee (Protocols #OHRI1666 and #CHEOe-3171), in accordance with the  
548 Canadian Council on Animal Care Standards and the Province of Ontario's Animals for  
549 Research Act. NSG mice (Jackson Laboratory) were maintained in sterile housing conditions and  
550 fed autoclaved chow and water ad libitum. Adult *casper* (41) zebrafish (a gift from Dr. Leonard  
551 Zon, Boston Children's Hospital, Boston, MA) were maintained in a recirculating commercial  
552 housing system (Aquatic Habitats, now Pentair) at 28°C in 14h:10h light:dark conditions in the  
553 aquatics facility at the University of Ottawa, Ottawa, ON. Adult *casper* zebrafish were bred  
554 according to standard protocol (42), and embryos were collected and grown in E3 medium (5mM  
555 NaCl, 0.17mM KCl, 0.33mM CaCl<sub>2</sub>, 0.33mM MgSO<sub>4</sub>) at 28°C in 10cm Petri dishes until the  
556 desired time point. Embryos were cleaned and provided with new media every 24hrs. See  
557 Supplementary Materials and Methods for additional experimental details.

558

### 559 **Statistical analysis**

560 All figures are presented with individual data points (where graphically appropriate), with  
561 measures of central tendency and error to be mean and standard deviation, respectively, unless  
562 otherwise stated. Data pre-processing, statistical tests employed, sample number, and measured  
563 of central tendency and spread are reported in the figure legends. Two-sided tests were  
564 employed, and significance was attributed when  $p < 0.05$ . All analyses were of data from three  
565 independent experiments without removal of statistical outliers. Statistical tests employed were  
566 parametric except for analyses of zebrafish invasion data, where a non-normal distribution was  
567 observed. Calculation of drug screen statistics (e.g., z-scores, selectivity scores) are described in  
568 the Supplementary Materials and Methods.

569 **LIST OF SUPPLEMENTARY MATERIALS**

570

571 Supplementary Materials and Methods

572

573 Fig. S1. Hydrogel culture of stem cell-derived disease models exhibits features of LAM.

574

575 Fig. S2. Hydrogel culture potentiates differential mTORC1-signalling between WT and TSC2<sup>-/-</sup>  
576 cells.

577

578 Fig. S3. Three-dimensional drug screen identifies HDAC inhibitors as anti-invasive and  
579 selectively cytotoxic towards TSC2<sup>-/-</sup> LAM cells.

580

581 Fig. S4. Three safe-in-human HDAC inhibitors induce mTORC1-dependent selective  
582 cytotoxicity exclusively in hydrogel culture.

583

584 Fig. S5. HDAC inhibitors attenuate cell invasion independent of cytotoxicity while mTOR  
585 inhibitors potentiate the invasion phenotype.

586

587 Fig. S6. HDAC inhibitors are anti-invasive and selectively cytotoxic towards TSC2<sup>-/-</sup> cells  
588 xenotransplanted into zebrafish.

589

590 Table S1. Differential gene expression analysis of bulk RNA-seq data, untreated samples only.

591

592 Table S2. GO term enrichment analysis of DEG lists.

593

594 Table S3. Three-dimensional drug screen raw data.

595

596 Table S4. Enrichment results via adaptation of GSEA.

597

598 Table S5. Elion<sup>TM</sup> structure-based compound analysis.

599

600 Movie S1. Brightfield Z-stack of WT invading through the hydrogel, counterstained with

601 Hoechst.

602

603 Movie S2. Brightfield Z-stack of *TSC2*<sup>-/-</sup> invading through the hydrogel, counterstained with

604 Hoechst.

605 **REFERENCES**

- 606 1. A. M. Taveira-DaSilva, J. Moss, Clinical features, epidemiology, and therapy of  
607 lymphangiomyomatosis, *Clin Epidemiol* **7**, 249–257 (2015).
- 608 2. J. Moss, N. A. Avila, P. M. Barnes, R. A. Litzenger, J. Bechtel, P. G. Brooks, C. J. Hedin,  
609 S. Hunsberger, A. S. Kristof, Prevalence and Clinical Characteristics of  
610 Lymphangiomyomatosis (LAM) in Patients with Tuberous Sclerosis Complex, *Am J*  
611 *Respir Crit Care Med* **164**, 669–671 (2001).
- 612 3. X. Zhe, L. Schuger, Combined Smooth Muscle and Melanocytic Differentiation in  
613 Lymphangiomyomatosis, *J Histochem Cytochem.* **52**, 1537–1542 (2004).
- 614 4. G. F. Abbott, M. L. Rosado-de-Christenson, A. A. Frazier, T. J. Franks, R. D. Pugatch, J. R.  
615 Galvin, From the archives of the AFIP: lymphangiomyomatosis: radiologic-pathologic  
616 correlation, *Radiographics* **25**, 803–828 (2005).
- 617 5. S. C. Chu, K. Horiba, J. Usuki, N. A. Avila, C. C. Chen, W. D. Travis, V. J. Ferrans, J. Moss,  
618 Comprehensive Evaluation of 35 Patients With Lymphangiomyomatosis, *Chest* **115**,  
619 1041–1052 (1999).
- 620 6. T. Urban, R. Lazor, J. Lacronique, M. Murrin, S. Labrune, D. Valeyre, J. F. Cordier,  
621 Pulmonary lymphangiomyomatosis. A study of 69 patients. Groupe d'Etudes et de  
622 Recherche sur les Maladies "Orphelines" Pulmonaires (GERM"O"P)., *Medicine (Baltimore)*  
623 **78**, 321–337 (1999).
- 624 7. E. P. Henske, F. X. McCormack, Lymphangiomyomatosis — a wolf in sheep's clothing, *J*  
625 *Clin Invest* **122**, 3807–3816 (2012).

- 626 8. A. M. Taveira-DaSilva, O. Hathaway, M. Stylianou, J. Moss, Changes in lung function and  
627 chyloous effusions in patients with lymphangioleiomyomatosis treated with sirolimus, *Ann.*  
628 *Intern. Med.* **154**, 797–805, W-292–293 (2011).
- 629 9. J. Bee, S. Fuller, S. Miller, S. R. Johnson, Lung function response and side effects to  
630 rapamycin for lymphangioleiomyomatosis: a prospective national cohort study, *Thorax* **73**,  
631 369–375 (2018).
- 632 10. J. Yao, A. M. Taveira-DaSilva, A. M. Jones, P. Julien-Williams, M. Stylianou, J. Moss,  
633 Sustained effects of sirolimus on lung function and cystic lung lesions in  
634 lymphangioleiomyomatosis, *Am. J. Respir. Crit. Care Med.* **190**, 1273–1282 (2014).
- 635 11. F. X. McCormack, Y. Inoue, J. Moss, L. G. Singer, C. Strange, K. Nakata, A. F. Barker, J. T.  
636 Chapman, M. L. Brantly, J. M. Stocks, K. K. Brown, J. P. I. Lynch, H. J. Goldberg, L. R.  
637 Young, B. W. Kinder, G. P. Downey, E. J. Sullivan, T. V. Colby, R. T. McKay, M. M.  
638 Cohen, L. Korbee, A. M. Taveira-DaSilva, H.-S. Lee, J. P. Krischer, B. C. Trapnell, Efficacy  
639 and Safety of Sirolimus in Lymphangioleiomyomatosis.  
640 <http://dx.doi.org/10.1056/NEJMoa1100391> (2011), doi:10.1056/NEJMoa1100391.
- 641 12. J. J. Bissler, F. X. McCormack, L. R. Young, J. M. Elwing, G. Chuck, J. M. Leonard, V. J.  
642 Schmithorst, T. Laor, A. S. Brody, J. Bean, S. Salisbury, D. N. Franz, Sirolimus for  
643 Angiomyolipoma in Tuberous Sclerosis Complex or Lymphangioleiomyomatosis, *N Engl J*  
644 *Med* **358**, 140–151 (2008).
- 645 13. E. A. Goncharova, D. A. Goncharov, A. Eszterhas, D. S. Hunter, M. K. Glassberg, R. S.  
646 Yeung, C. L. Walker, D. Noonan, D. J. Kwiatkowski, M. M. Chou, R. A. Panettieri, V. P.  
647 Krymskaya, Tuberin regulates p70 S6 kinase activation and ribosomal protein S6

- 648 phosphorylation. A role for the TSC2 tumor suppressor gene in pulmonary  
649 lymphangioliomyomatosis (LAM), *J. Biol. Chem.* **277**, 30958–30967 (2002).
- 650 14. S. P. Delaney, L. M. Julian, A. Pietrobon, J. Yockell-Lelièvre, C. Doré, T. T. Wang, V. C.  
651 Doyon, A. Raymond, D. A. Patten, A. S. Kristof, M.-E. Harper, H. Sun, W. L. Stanford,  
652 Human pluripotent stem cell modeling of tuberous sclerosis complex reveals lineage-specific  
653 therapeutic vulnerabilities, *bioRxiv* , 683359 (2020).
- 654 15. D. J. Kwiatkowski, Animal Models of Lymphangioliomyomatosis (LAM) and Tuberous  
655 Sclerosis Complex (TSC), *Lymphatic Research and Biology* **8**, 51–57 (2010).
- 656 16. S. R. Caliani, J. A. Burdick, A practical guide to hydrogels for cell culture, *Nature Methods*  
657 **13**, 405–414 (2016).
- 658 17. J. A. Burdick, G. D. Prestwich, Hyaluronic Acid Hydrogels for Biomedical Applications,  
659 *Advanced Materials* **23**, H41–H56 (2011).
- 660 18. R. Y. Tam, J. Yockell-Lelièvre, L. J. Smith, L. M. Julian, A. E. G. Baker, C. Choey, M. S.  
661 Hasim, J. Dimitroulakos, W. L. Stanford, M. S. Shoichet, Rationally Designed 3D Hydrogels  
662 Model Invasive Lung Diseases Enabling High-Content Drug Screening, *Advanced Materials*  
663 **31**, 1806214 (2019).
- 664 19. R. Edmondson, J. J. Broglie, A. F. Adcock, L. Yang, Three-dimensional cell culture systems  
665 and their applications in drug discovery and cell-based biosensors., *Assay Drug Dev Technol*  
666 **12**, 207–218 (2014).
- 667 20. A. E. G. Baker, L. C. Bahlmann, R. Y. Tam, J. C. Liu, A. N. Ganesh, N. Mitrousis, R.  
668 Marcellus, M. Spears, J. M. S. Bartlett, D. W. Cescon, G. D. Bader, M. S. Shoichet,  
669 Benchmarking to the Gold Standard: Hyaluronan-Oxime Hydrogels Recapitulate Xenograft

- 670 Models with In Vitro Breast Cancer Spheroid Culture, *Advanced Materials* **31**, 1901166  
671 (2019).
- 672 21. C. A. MacRae, R. T. Peterson, Zebrafish as tools for drug discovery, *Nature Reviews Drug*  
673 *Discovery* **14**, 721–731 (2015).
- 674 22. D. C. Swinney, J. Anthony, How were new medicines discovered?, *Nature Reviews Drug*  
675 *Discovery* **10**, 507–519 (2011).
- 676 23. L. M. Julian, S. P. Delaney, Y. Wang, A. A. Goldberg, C. Doré, J. Yockell-Lelièvre, R. Y.  
677 Tam, K. Giannikou, F. McMurray, M. S. Shoichet, M.-E. Harper, E. P. Henske, D. J.  
678 Kwiatkowski, T. N. Darling, J. Moss, A. S. Kristof, W. L. Stanford, Human Pluripotent Stem  
679 Cell–Derived TSC2-Haploinsufficient Smooth Muscle Cells Recapitulate Features of  
680 Lymphangi leiomyomatosis, *Cancer Res* (2017), doi:10.1158/0008-5472.CAN-17-0925.
- 681 24. M. Guo, J. J. Yu, A. K. Perl, K. A. Wikenheiser-Brokamp, M. Riccetti, E. Y. Zhang, P.  
682 Sudha, M. Adam, A. Potter, E. J. Koprass, K. Giannikou, S. S. Potter, S. Sherman, S. R.  
683 Hammes, D. J. Kwiatkowski, J. A. Whitsett, F. X. McCormack, Y. Xu, Single Cell  
684 Transcriptomic Analysis Identifies a Unique Pulmonary Lymphangi leiomyomatosis Cell,  
685 *American Journal of Respiratory and Critical Care Medicine* (2020),  
686 doi:10.1164/rccm.201912-2445OC.
- 687 25. H. Zhang, G. Cicchetti, H. Onda, H. B. Koon, K. Asrican, N. Bajraszewski, F. Vazquez, C.  
688 L. Carpenter, D. J. Kwiatkowski, Loss of Tsc1/Tsc2 activates mTOR and disrupts PI3K-Akt  
689 signaling through downregulation of PDGFR, *J Clin Invest* **112**, 1223–1233 (2003).
- 690 26. A. Giese, M. A. Loo, N. Tran, D. Haskett, S. W. Coons, M. E. Berens, Dichotomy of  
691 astrocytoma migration and proliferation, *Int. J. Cancer* **67**, 275–282 (1996).

- 692 27. A. J. Valvezan, B. D. Manning, Molecular logic of mTORC1 signalling as a metabolic  
693 rheostat, *Nat Metab* **1**, 321–333 (2019).
- 694 28. D. S. Schrupp, Cytotoxicity Mediated by Histone Deacetylase Inhibitors in Cancer Cells:  
695 Mechanisms and Potential Clinical Implications, *Clin Cancer Res* **15**, 3947–3957 (2009).
- 696 29. A. S. Alzahrani, PI3K/Akt/mTOR inhibitors in cancer: At the bench and bedside, *Seminars*  
697 *in Cancer Biology* **59**, 125–132 (2019).
- 698 30. A. L. Fridman, M. A. Tainsky, Critical pathways in cellular senescence and immortalization  
699 revealed by gene expression profiling, *Oncogene* **27**, 5975–5987 (2008).
- 700 31. B. Adane, G. Alexe, B. K. A. Seong, D. Lu, E. E. Hwang, D. Hnisz, C. A. Lareau, L. Ross,  
701 S. Lin, F. S. Dela Cruz, M. Richardson, A. S. Weintraub, S. Wang, A. B. Iniguez, N. V.  
702 Dharia, A. S. Conway, A. L. Robichaud, B. Tanenbaum, J. M. Krill-Burger, F. Vazquez, M.  
703 Schenone, J. N. Berman, A. L. Kung, S. A. Carr, M. J. Aryee, R. A. Young, B. D. Crompton,  
704 K. Stegmaier, STAG2 loss rewires oncogenic and developmental programs to promote  
705 metastasis in Ewing sarcoma, *Cancer Cell* **39**, 827-844.e10 (2021).
- 706 32. A. M. El-Naggar, C. J. Veinotte, H. Cheng, T. G. P. Grunewald, G. L. Negri, S. P.  
707 Somasekharan, D. P. Corkery, F. Tirode, J. Mathers, D. Khan, A. H. Kyle, J. H. Baker, N. E.  
708 LePard, S. McKinney, S. Hajee, M. Bosiljic, G. Leprivier, C. E. Tognon, A. I. Minchinton,  
709 K. L. Bennewith, O. Delattre, Y. Wang, G. Dellaire, J. N. Berman, P. H. Sorensen,  
710 Translational Activation of HIF1 $\alpha$  by YB-1 Promotes Sarcoma Metastasis, *Cancer Cell* **27**,  
711 682–697 (2015).
- 712 33. F. Yang, S. Sun, C. Wang, M. Haas, S. Yeo, J.-L. Guan, Targeted therapy for mTORC1-  
713 driven tumours through HDAC inhibition by exploiting innate vulnerability of mTORC1  
714 hyper-activation, *British Journal of Cancer* , 1–12 (2020).



- 715 34. B. S. Mann, J. R. Johnson, M. H. Cohen, R. Justice, R. Pazdur, FDA approval summary:  
716 vorinostat for treatment of advanced primary cutaneous T-cell lymphoma, *Oncologist* **12**,  
717 1247–1252 (2007).
- 718 35. L. A. Raedler, Farydak (Panobinostat): First HDAC Inhibitor Approved for Patients with  
719 Relapsed Multiple Myeloma, *Am Health Drug Benefits* **9**, 84–87 (2016).
- 720 36. T. E. Witzig, C. Reeder, J. J. Han, B. LaPlant, M. Stenson, H. W. Tun, W. Macon, S. M.  
721 Ansell, T. M. Habermann, D. J. Inwards, I. N. Micallef, P. B. Johnston, L. F. Porrata, J. P.  
722 Colgan, S. Markovic, G. S. Nowakowski, M. Gupta, The mTORC1 inhibitor everolimus has  
723 antitumor activity in vitro and produces tumor responses in patients with relapsed T-cell  
724 lymphoma, *Blood* **126**, 328–335 (2015).
- 725 37. E. H. Rubin, N. G. B. Agrawal, E. J. Friedman, P. Scott, K. E. Mazina, L. Sun, L. Du, J. L.  
726 Ricker, S. R. Frankel, K. M. Gottesdiener, J. A. Wagner, M. Iwamoto, A Study to Determine  
727 the Effects of Food and Multiple Dosing on the Pharmacokinetics of Vorinostat Given Orally  
728 to Patients with Advanced Cancer, *Clin Cancer Res* **12**, 7039–7045 (2006).
- 729 38. F. Giles, T. Fischer, J. Cortes, G. Garcia-Manero, J. Beck, F. Ravandi, E. Masson, P. Rae, G.  
730 Laird, S. Sharma, H. Kantarjian, M. Dugan, M. Albitar, K. Bhalla, A Phase I Study of  
731 Intravenous LBH589, a Novel Cinnamic Hydroxamic Acid Analogue Histone Deacetylase  
732 Inhibitor, in Patients with Refractory Hematologic Malignancies, *Clin Cancer Res* **12**, 4628–  
733 4635 (2006).
- 734 39. W. P. Yong, B. C. Goh, R. A. Soo, H. C. Toh, K. Ethirajulu, J. Wood, V. Novotny-Diermayr,  
735 S. C. Lee, W. L. Yeo, D. Chan, D. Lim, E. Seah, R. Lim, J. Zhu, Phase I and  
736 pharmacodynamic study of an orally administered novel inhibitor of histone deacetylases,  
737 SB939, in patients with refractory solid malignancies, *Ann Oncol* **22**, 2516–2522 (2011).

- 738 40. C. Zhang, V. Richon, X. Ni, R. Talpur, M. Duvic, Selective Induction of Apoptosis by  
739 Histone Deacetylase Inhibitor SAHA in Cutaneous T-Cell Lymphoma Cells: Relevance to  
740 Mechanism of Therapeutic Action, *Journal of Investigative Dermatology* **125**, 1045–1052  
741 (2005).
- 742 41. R. M. White, A. Sessa, C. Burke, T. Bowman, J. LeBlanc, C. Ceol, C. Bourque, M. Dovey,  
743 W. Goessling, C. E. Burns, L. I. Zon, Transparent Adult Zebrafish as a Tool for In Vivo  
744 Transplantation Analysis, *Cell Stem Cell* **2**, 183–189 (2008).
- 745 42. M. Westerfield, *THE Zebrafish Book a Guide for the Laboratory Use of Zebrafish Danio\**.
- 746 43. A. Subramanian, P. Tamayo, V. K. Mootha, S. Mukherjee, B. L. Ebert, M. A. Gillette, A.  
747 Paulovich, S. L. Pomeroy, T. R. Golub, E. S. Lander, J. P. Mesirov, Gene set enrichment  
748 analysis: A knowledge-based approach for interpreting genome-wide expression profiles,  
749 *Proc. Natl. Acad. Sci.* **102**, 15545–15550 (2005).
- 750 44. D. P. Corkery, G. Dellaire, J. N. Berman, Leukaemia xenotransplantation in zebrafish –  
751 chemotherapy response assay in vivo, *Br. J. Haematol.* **153**, 786–789 (2011).
- 752 45. H. M, T. C, S. Wl, M. P, Human melanoma cells transplanted into zebrafish proliferate,  
753 migrate, produce melanin, form masses and stimulate angiogenesis in zebrafish.,  
754 *Angiogenesis* **9**, 139–151 (2006).

755 **ACKNOWLEDGEMENTS**

756 We thank Catherine Lawrence for her inspiration, members of our labs for continued insights,  
757 the Ottawa Bioinformatics Core Facility (particularly Christopher Porter) for assistance in  
758 processing RNA-seq data, and the Human Pluripotent Stem Cell Core Facility and Rima Al-awar  
759 (Ontario Institute for Cancer Research) for the custom designed drug library.

760

761 **Funding:**

762 Canadian Institutes for Health Research (CIHR) grant FRN-153188 (WLS)

763 LAM Foundation pilot grant LAM0123P01-17 (WLS)

764 Funds from Green Eggs and LAM (WLS and MSS)

765 CIHR Vanier Canada Graduate Scholarship (AP)

766 CIHR Tier 1 Canada Research Chair Program in Integrative Stem Cell Biology (WLS)

767

768 **Author contributions:**

769 Conceptualization: AP, JYL, SPD, RYT, JNB, MSS, WLS

770 Methodology: AP, JYL, NM, LJS, NA, CX, NM, LMJ, RYT, MSS, WLS

771 Investigation: AP, JYL, NM, NA, NM, EL, AC, CD

772 Visualization: AP, JYL

773 Funding acquisition: MSS, WLS

774 Supervision: GM, LMJ, ASK, RYT, JNB, MSS, WLS

775 Writing – original draft: AP, WLS

776 Writing – review & editing: AP, JYL, NM, LJS, SPD, NA, CX, EL, AC, CD, GM, LMJ, ASK,

777 RYT, JNB, MSS, WLS

778

779 **Competing interests:** Authors declare that they have no competing interests.

780

781 **Data and materials availability:** Processed data are available in the main text and the

782 supplementary materials. Raw RNA-seq data is accessible at the GEO repository with accession

783 GSE179044. Code written in house for data processing is available on request.

784 **FIGURES**

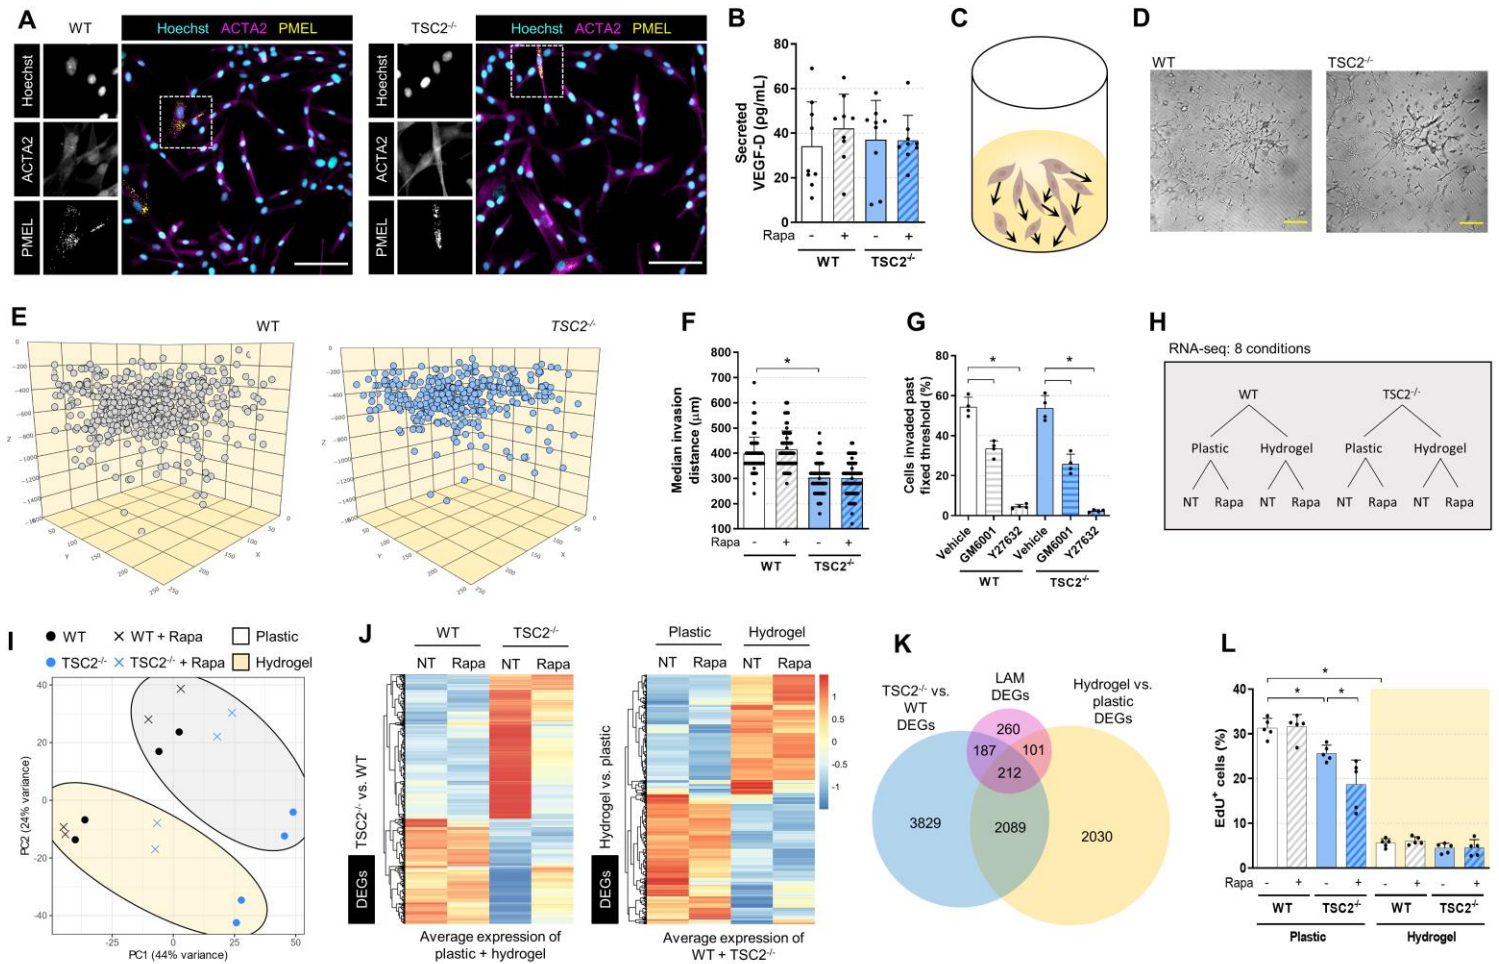

785 **Fig. 1. Hydrogel culture of stem cell-derived disease models exhibits features of LAM. (A)**

786 Representative immunofluorescence images of *WT* and *TSC2*<sup>-/-</sup> cells. Inset showing punctate

787 PMEL and fibril ACTA2 staining. Scale bars of 100µM. **(B)** VEGF-D secreted into conditioned

788 media measured by ELISA, following 16hr incubation in serum-free media ± 20nM rapamycin

789 (mean ± SD; \* =  $p < 0.05$  by Student t-test;  $n = 9-10$ ). **(C-E)** Visualization of LAM cell invasion

790 after three days in hydrogel culture, as **(C)** a schematic, **(D)** brightfield image of single Z plane,

791 scale bars of 250µm, and **(E)** computational reconstruction of cellular spatial positions. **(F)**

792 Median invasion distance of cellular populations plated on the hydrogel and cultured for three

793 days ± 20nM rapamycin (mean ± SD; \* =  $p < 0.05$  by Student t-test;  $n = 124$ ). **(G)** Percentage of

794 cells invaded past fixed threshold set by median invasion distance of genotype-matched vehicle  
795 control. Cells were cultured and treated for three days (10 $\mu$ M GM6001, a pan-MMP inhibitor,  
796 and 20 $\mu$ M Y27632, a ROCK inhibitor, mean  $\pm$  SD; \* =  $p < 0.05$  by Student t-test; n = 4). **(H)**  
797 Schematic of the sample conditions tested in the bulk RNA-seq experiment. NT = no treatment,  
798 Rapa = rapamycin treatment (20nM, 72 hrs). **(I)** Principal components analysis (PCA) of bulk  
799 RNA-seq samples. **(J)** Heatmap and hierarchal clustering of differentially expressed genes  
800 (DEGs) between *TSC2*<sup>-/-</sup> and WT samples, and between hydrogel and plastic samples, while  
801 controlling for the reciprocal covariate. Left panel: transcript expression for plastic and hydrogel  
802 cultures were averaged. Right panel: transcript expression for WT and *TSC2*<sup>-/-</sup> samples were  
803 averaged. DEG analysis was performed with no treatment samples; genes noted as differentially  
804 expressed if  $FDR < 0.05$  and  $|\log_2FC| > 1$ . **(K)** Overlap in DEG between genotype and ECM  
805 gene lists and LAM cell signature gene list (24). Genes noted as DE if  $FDR < 0.05$ . **(L)**  
806 Percentage of EdU<sup>+</sup> (proliferating) cells from 3-hour pulse (5 $\mu$ M), after three days cultured on  
807 plastic or hydrogel  $\pm$  20nM rapamycin (mean  $\pm$  SD; \* =  $p < 0.05$  by Student t-test; n = 5).

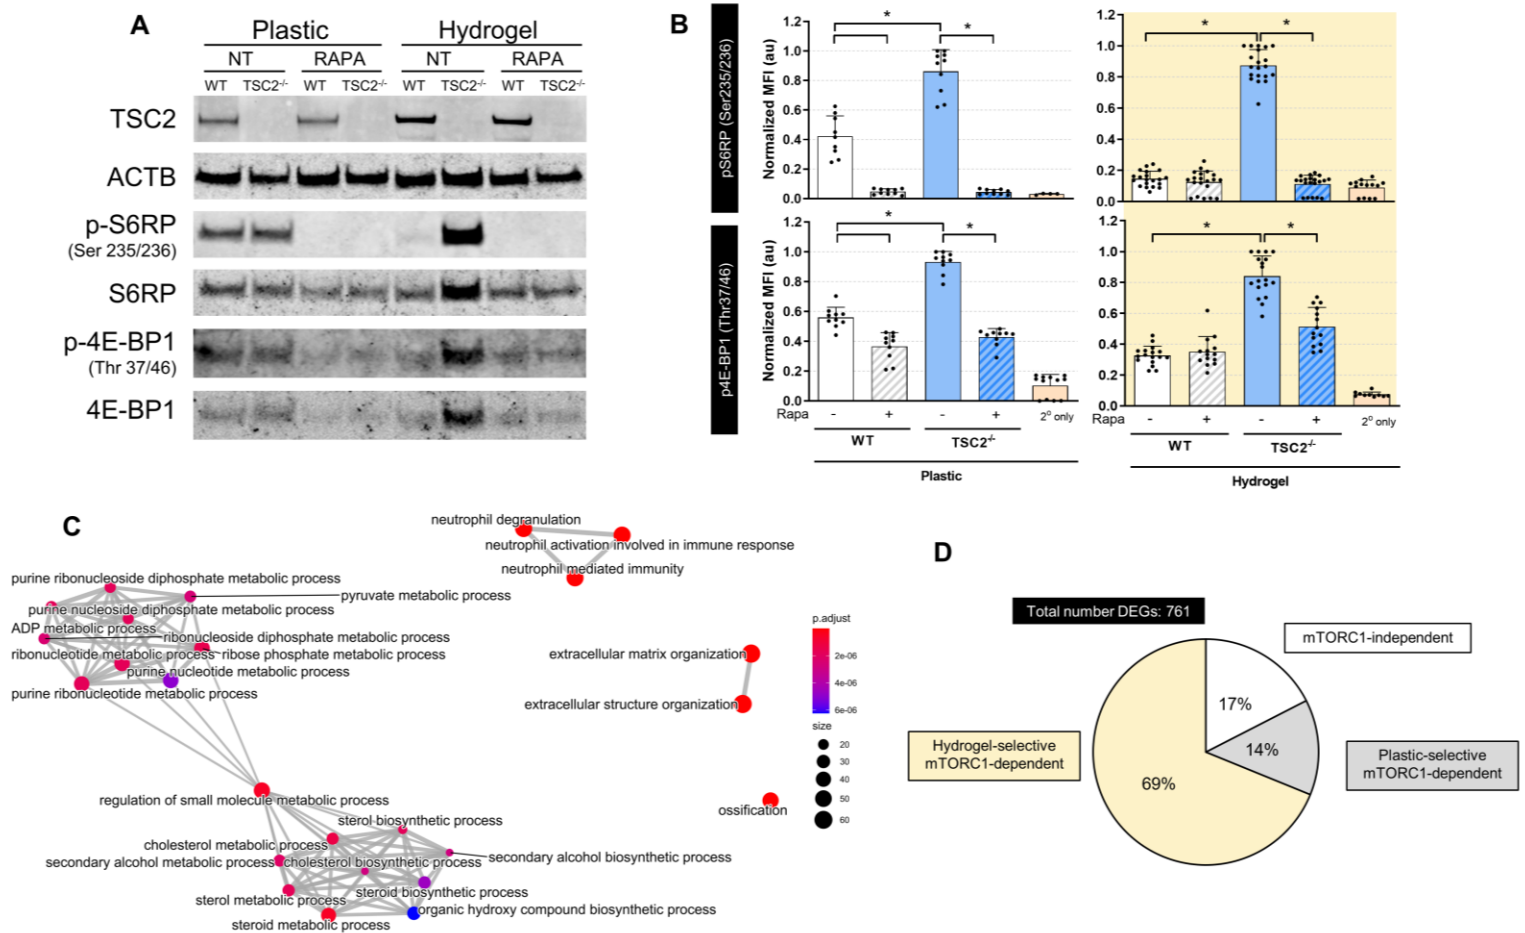

808 **Fig. 2. Hydrogel culture potentiates differential mTORC1-signalling between WT and**  
 809 **TSC2<sup>-/-</sup> cells. (A)** Low input Western blot of protein collected from cells cultured for three days  
 810 on plastic or hydrogel ± 20nM rapamycin. NT = no treatment, Rapa = rapamycin treatment. **(B)**  
 811 Quantification of immunofluorescence values reported in normalized (scaled by replicate  
 812 maximum value) mean fluorescence intensity. Each point indicates the mean fluorescence  
 813 intensity from a well of cells cultured on hydrogel or plastic for three days ± 20nM rapamycin.  
 814 Secondary only values are determined from wells probed with fluorescent secondary antibody  
 815 only (mean ± SD; \* = p < 0.05 by Student t-test; n = 9-20). **(C)** Network analysis of GO terms  
 816 enriched in the list of DEGs found significant (FDR < 0.05) in the interaction between genotype  
 817 and culture substrate. The 25 most significantly enriched terms are plotted. **(D)** Classification of

818 DEGs according to pattern of expression across genotypes, ECM condition, and in the presence  
819 or absence of rapamycin. Gene clusters and classification scheme shown in Fig. S2B-C).



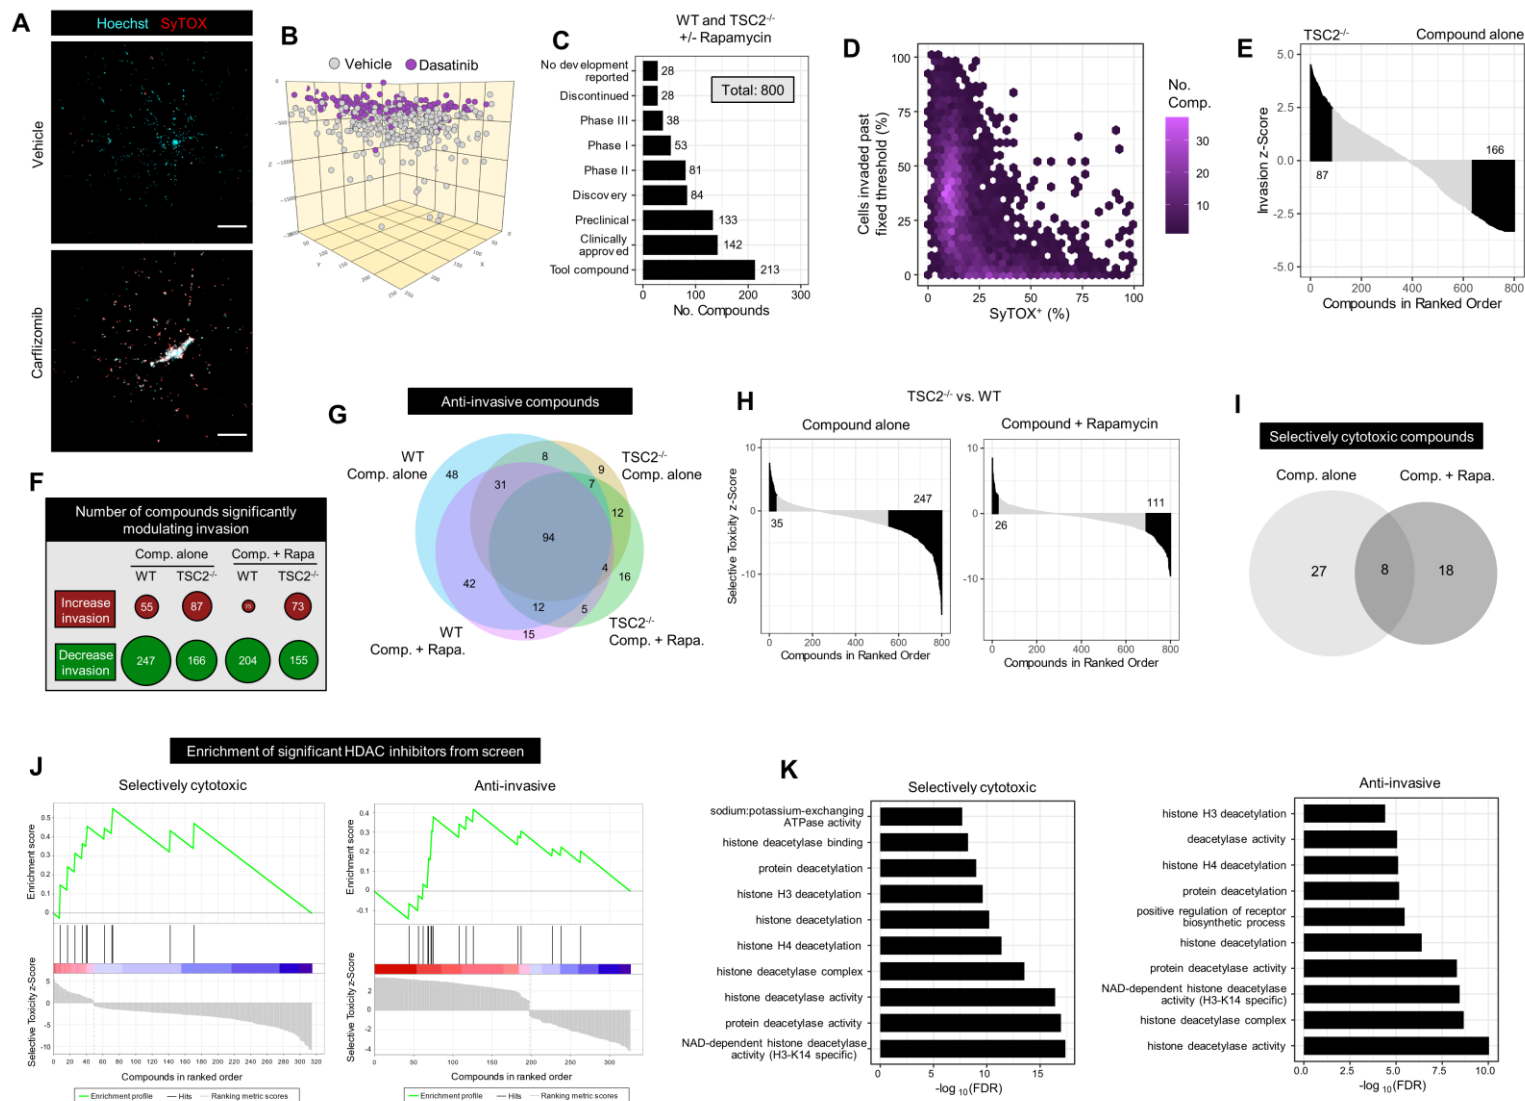

820 **Fig. 3. Three-dimensional drug screen identifies HDAC inhibitors as anti-invasive and**  
 821 **selectively cytotoxic towards TSC2<sup>-/-</sup> LAM cells. (A)** Representative maximum intensity  
 822 projection image of TSC2<sup>-/-</sup> cells in hydrogel culture for three days ± 200nM carfilzomib. Scale  
 823 bars of 250µm. **(B)** Computational reconstruction of cellular spatial positions following three-  
 824 day hydrogel culture of TSC2<sup>-/-</sup> cells ± 40nM dasatinib. Note that treated and untreated were in  
 825 separate wells; cells were plotted in the same volume for ease of visualizing relative distances  
 826 travelled. **(C)** Highest development status reported for the 800 compounds contained in the  
 827 curated kinase inhibitor and tool compound libraries. A 3D drug screen was conducted on WT

828 and *TSC2*<sup>-/-</sup> cells following three-day treatment with 5 $\mu$ M compounds  $\pm$  20nM rapamycin. **(D)**  
829 Compound invasion modulation plotted against cytotoxicity, aggregating results across genotype  
830 and rapamycin treatment. Fixed invasion threshold determined by median invasion distance of  
831 untreated controls. Hexagonal plot employed to demonstrate compound densities. **(E)** Waterfall  
832 plot of compound invasion z-scores in ranked order; positive values indicate invasion  
833 potentiation, while negative values indicate invasion attenuation. Compounds conferring  
834 statistically significant invasion modulation highlighted in black. Data presented for *TSC2*<sup>-/-</sup>, no  
835 rapamycin treatment condition. **(F)** Number of compounds significantly modulating invasion  
836 (potentiating or attenuating) for each genotype in the presence of absence of 20nM rapamycin.  
837 Bubble area proportional to number of statistically significant targets. **(G)** Overlap of compounds  
838 identified as anti-invasive in each listed condition. **(H)** Waterfall plots of compound selective  
839 toxicity z-scores in ranked order; positive values indicate increased cytotoxicity towards *TSC2*<sup>-/-</sup>  
840 cells, negative values indicate increased cytotoxicity towards WT cells. Compounds conferring  
841 statistically significant selective cytotoxicity highlighted in black. **(I)** Overlap of compounds  
842 identified to be selectivity cytotoxic towards *TSC2*<sup>-/-</sup> cells, with or without 20nM rapamycin. **(J)**  
843 Enrichment plot for compounds annotated to target HDACs, derived from an adapted  
844 implementation of GSEA. Hits (black vertical lines) in the red region indicate compounds with a  
845 favourable effect, hits in the blue region indicate compounds with an undesirable effect. **(K)** Top  
846 10 most statistically significant GO terms. Analysis performed using targets identified as  
847 statistically significantly enriched in screen data by Elion<sup>TM</sup> algorithm.

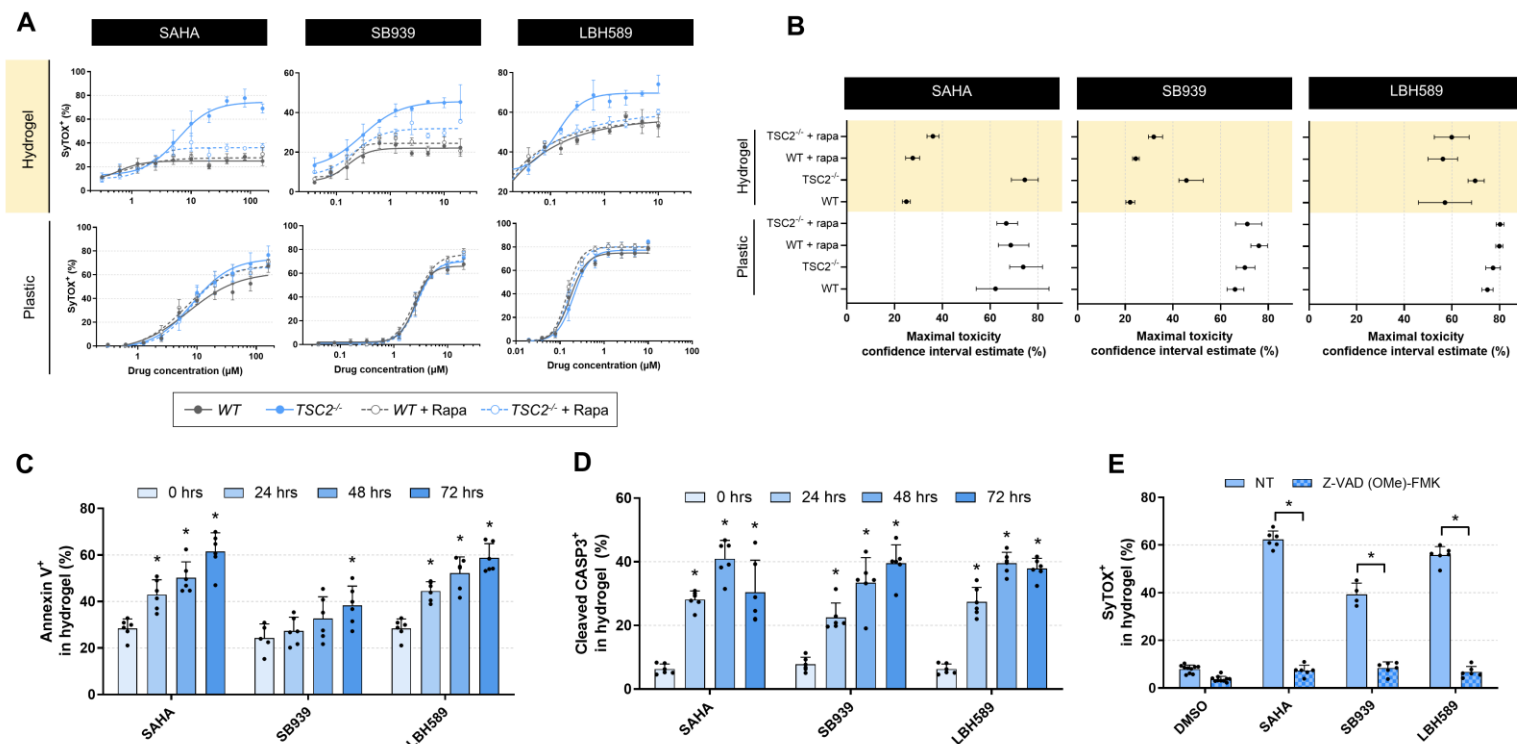

848 **Fig. 4. Three safe-in-human HDAC inhibitors induce mTORC1-dependent selective**  
 849 **cytotoxicity exclusively in hydrogel culture. (A)** Dose-response cytotoxicity curves of cells  
 850 treated with the indicated HDAC inhibitor for three days while cultured on plastic or hydrogel ±  
 851 20nM rapamycin. Data fit via four-parameter logistic regression (mean ± SD; n = 3). **(B)**  
 852 Confidence intervals of HDAC inhibitor maximal toxicity, estimated by four-parameter logistic  
 853 regression models generated in A. **(C-D)** Quantification of *TSC2*<sup>-/-</sup> cells positive for **(C)** Annexin  
 854 V or **(D)** cleaved caspase 3, following three-day treatment with HDAC inhibitors in hydrogel  
 855 (20μM SAHA, 5μM SB939, and 1μM LHB589, mean ± SD; \* = p < 0.05 by ANOVA with  
 856 Dunnett post-hoc comparison to 0 hrs; n = 6). **(E)** Quantification of *TSC2*<sup>-/-</sup> cells positive for  
 857 SyTOX following three-day HDAC inhibitor treatment (20μM SAHA, 5μM SB939, and 1μM  
 858 LHB589) in hydrogel ± 25μM Z-VAD (OMe)-FMK (mean ± SD; \* = p < 0.05 by Student t-test;  
 859 n = 4-6).

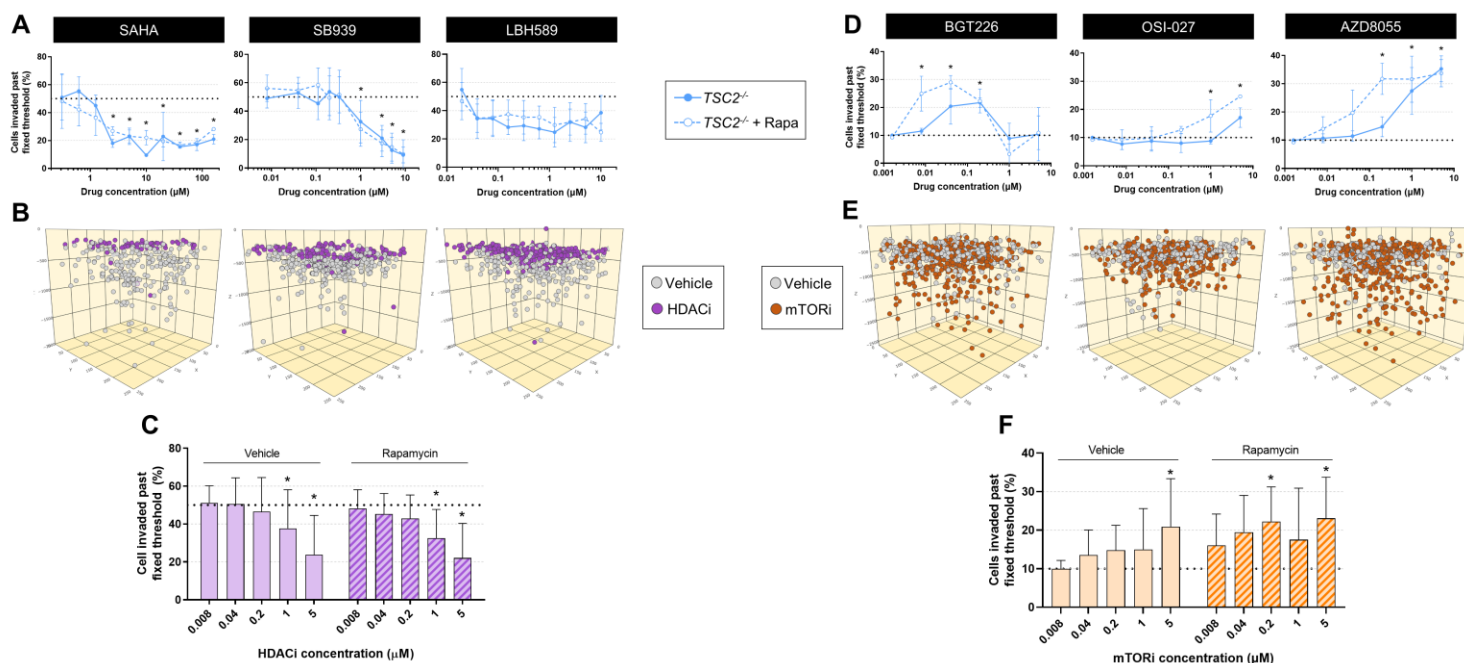

860 **Fig. 5. HDAC inhibitors attenuate cell invasion independent of cytotoxicity while mTOR**  
 861 **inhibitors potentiate the invasion phenotype.** (A) Live *TSC2*<sup>-/-</sup> cells invaded past  
 862 threshold set by median invasion distance of vehicle control, upon three-day HDAC inhibitor  
 863 treatment ± 20nM rapamycin (mean ± SD; \* = p < 0.05 by ANOVA with Dunnett post-hoc  
 864 comparison to untreated; n = 3). (B) Computational reconstruction of live cell spatial positions  
 865 upon three-day hydrogel culture of *TSC2*<sup>-/-</sup> cells ± HDAC inhibitor (HDACi) treatment (5μM  
 866 SAHA, 5μM SB939, 1μM LBH589). Note that treated and untreated cells were in separate  
 867 wells; cells were plotted in the same volume for ease of visualizing relative distances travelled.  
 868 (C) Aggregated effect of 11 HDAC inhibitors on *TSC2*<sup>-/-</sup> live cell invasion ± 20nM rapamycin.  
 869 Fixed threshold set by median invasion distance of vehicle control (mean ± SD; \* = p < 0.05 by  
 870 ANOVA with Dunnett post-hoc comparison to untreated; n = 33 via 11 HDACi, n = 3 each). (D)  
 871 Live *TSC2*<sup>-/-</sup> cells invaded past fixed threshold set by 90<sup>th</sup> percentile invasion distance of vehicle  
 872 control, upon three-day mTOR inhibitor treatment ± 20nM rapamycin (mean ± SD; \* = p < 0.05  
 873 by ANOVA with Dunnett post-hoc comparison to untreated; n = 3). (E) Computational

874 reconstruction of live cell spatial positions upon three-day hydrogel culture of *TSC2*<sup>-/-</sup> ± mTOR  
875 inhibitor treatment (40nM BGT226, 5μM OSI-027, 5μM AZD8055). (F) Aggregated effect of 3  
876 mTOR inhibitors (mTORi) on *TSC2*<sup>-/-</sup> live cell invasion ± 20nM rapamycin. Fixed threshold set  
877 by 90<sup>th</sup> percentile invasion distance of vehicle control (mean ± SD; \* = p < 0.05 by ANOVA with  
878 Dunnett post-hoc comparison to untreated; n = 9 via 3 mTORi, n = 3 each).

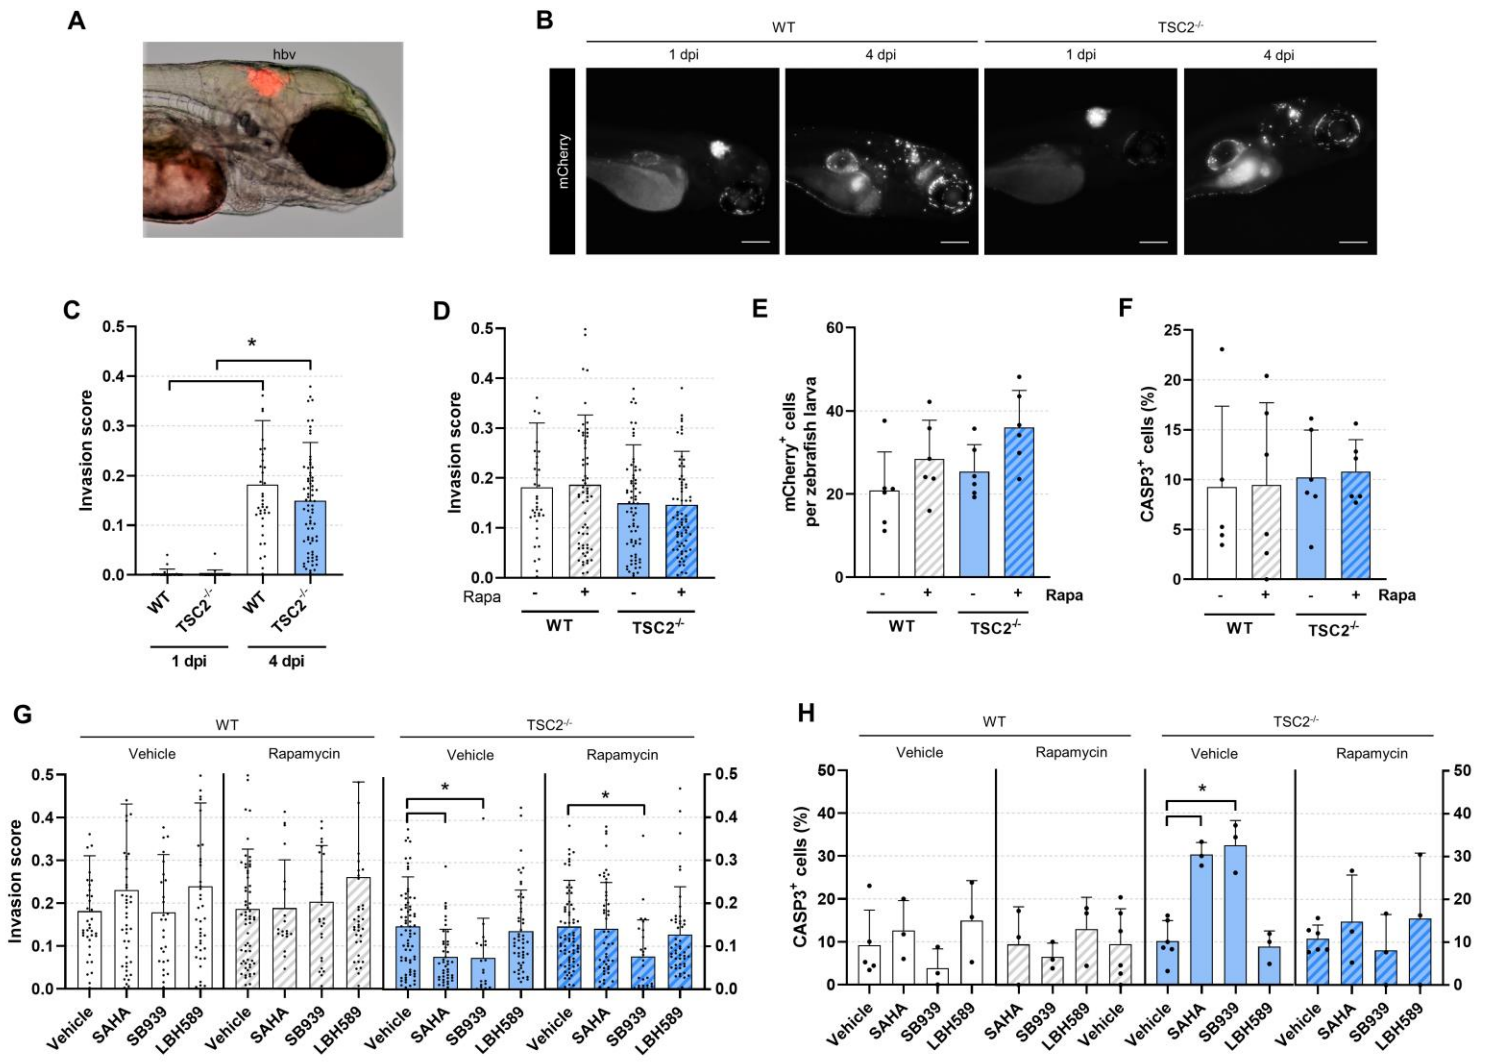

879 **Fig. 6. HDAC inhibitors are anti-invasive and selectively cytotoxic towards  $TSC2^{-/-}$  cells**

880 **xenotransplanted into zebrafish.** (A) Representative phase contrast image of 1 day post-

881 injection (dpi) zebrafish larvae injected with  $TSC2^{-/-}$  mCherry<sup>+</sup> cells into the hindbrain ventricle

882 (hbv). (B) Representative images of zebrafish larvae injected with mCherry<sup>+</sup> WT or  $TSC2^{-/-}$  cells

883 into the hbv. Fish were imaged 1 and 4 dpi. Scale bars of 200 $\mu$ m. (C-D) Quantification of cell

884 invasion using automated invasion analysis. Images analyzed in (D) were taken 4 dpi following

885 three-day treatment  $\pm$  20nM rapamycin (mean  $\pm$  SD; \* =  $p < 0.05$  by Mann-Whitney U test; n =

886 38 - 73). (E) Number of mCherry<sup>+</sup> cells detected per zebrafish following whole larvae

887 dissociation at 4 dpi and analysis by flow cytometry. Samples were treated for three days  $\pm$

888 20nM rapamycin. Each replicate is a pool of 15 – 20 zebrafish larvae (mean  $\pm$  SD; \* =  $p < 0.05$   
889 by Student t-test; n = 6). **(F)** Percentage of CASP3<sup>+</sup> cells in the mCherry<sup>+</sup> population from whole  
890 larvae dissociation at 4 dpi, following 3-day treatment  $\pm$  20nM rapamycin. Each replicate is a  
891 pool of 15 – 20 zebrafish larvae (mean  $\pm$  SD; \* =  $p < 0.05$  by Student t-test; n = 5 – 6). **(G-H)**  
892 Effect of three-day HDAC inhibitor treatment (20 $\mu$ M SAHA, 5 $\mu$ M SB939, 1 $\mu$ M LBH589)  $\pm$   
893 20nM rapamycin. **(G)** Invasion scores calculated on images acquired 4dpi (mean  $\pm$  SD; \* =  
894  $p < 0.05$  by the Kruskal-Wallis test with Dunn’s post-hoc comparison to vehicle treated; n = 27 –  
895 73). **(H)** Percentage of CASP3<sup>+</sup> cells in the mCherry<sup>+</sup> population from whole larvae dissociation  
896 at 4 dpi. Each replicate is a pool of 15 – 20 zebrafish larvae (mean  $\pm$  SD; \* =  $p < 0.05$  by  
897 ANOVA with Dunnett post-hoc comparison to vehicle treated; n = 3 – 6). Not all outliers in **(C-**  
898 **D)** and **(G)** are visualized due to trimmed axes (although outliers were included in mean  $\pm$  SD  
899 and the statistical calculation).



900  
901  
902  
903  
904  
905  
906  
907  
908  
909  
910  
911  
912  
913  
914  
915  
916  
917  
918  
919  
920  
921  
922  
923  
924  
925  
926  
927  
928  
929  
930  
931  
932  
933  
934  
935  
936  
937  
938

## SUPPLEMENTARY MATERIAL

### Three-dimensional drug screen identifies HDAC inhibitors as therapeutic agents in mTORC1-driven lymphangiomyomatosis

**Authors:** Adam Pietrobon<sup>1,2,3</sup>, Julien Yockell-Lelièvre<sup>1,3</sup>, Nicole Melong<sup>4</sup>, Laura J. Smith<sup>5,6,7</sup>, Sean P. Delaney<sup>1,2,3</sup>, Nadine Azzam<sup>4</sup>, Chang Xue<sup>6,7</sup>, Nishanth Merwin<sup>8</sup>, Eric Lian<sup>1,2,3</sup>, Alberto Camacho-Magallanes<sup>1,2,3</sup>, Carole Doré<sup>1</sup>, Gabriel Musso<sup>8</sup>, Lisa M. Julian<sup>9</sup>, Arnold S. Kristof<sup>10</sup>, Roger Y. Tam<sup>11</sup>, Jason N. Berman<sup>2,4</sup>, Molly S. Shoichet<sup>5,6,7,12</sup>, William L. Stanford<sup>1,2,3\*</sup>

**Affiliations:**

<sup>1</sup> The Sprott Centre for Stem Cell Research, Regenerative Medicine Program, Ottawa Hospital Research Institute; Ottawa, Canada.

<sup>2</sup> Department of Cellular and Molecular Medicine, University of Ottawa; Ottawa, Canada.

<sup>3</sup> Ottawa Institute of Systems Biology; Ottawa, Canada.

<sup>4</sup> Department of Pediatrics, CHEO Research Institute; Ottawa, Canada.

<sup>5</sup> Department of Chemical Engineering and Applied Chemistry, University of Toronto; Toronto, Canada.

<sup>6</sup> Institute for Biomaterials and Biomedical Engineering, University of Toronto; Toronto, Canada.

<sup>7</sup> The Donnelly Centre for Cellular and Biomolecular Research; Toronto, Canada.

<sup>8</sup> BioSymetrics, Inc; Toronto, Canada.

<sup>9</sup> Centre for Cell Biology, Development, and Disease, Department of Biological Sciences, Simon Fraser University; Burnaby, Canada.

<sup>10</sup> Meakins-Christie Laboratories and Translational Research in Respiratory Diseases Program, Research Institute of the McGill University Health Centre, Faculty of Medicine, Departments of Medicine and Critical Care; Montreal, Canada.

<sup>11</sup> Centre for Biologics Evaluation, Biologic and Radiopharmaceutical Drugs Directorate, Health Canada; Ottawa, Canada.

<sup>12</sup> Department of Chemistry, University of Toronto; Toronto, Canada.

\* Corresponding author

Dr. William L. Stanford, Ph.D.

The Ottawa Hospital, 501 Smyth Rd, Box 511, CCW 5206c

Ottawa, ON K1H 8L6, Canada

[wstanford@ohri.ca](mailto:wstanford@ohri.ca)

**One Sentence Summary:** We performed a drug screen in 3D and discovered HDAC inhibitors exhibit therapeutic efficacy in models of the lung disease lymphangiomyomatosis.



## 939 SUPPLEMENTARY MATERIALS AND METHODS

### 940 Study reagents and resources

941 Please see below (**Table 1**) for a list of key reagents and resources used in this study.

942

943 **Table 1:** List of key reagents and resources used in this study.

| REAGENTS and RESOURCES                    | SOURCE                                | IDENTIFIER |
|-------------------------------------------|---------------------------------------|------------|
| <b>Antibodies</b>                         |                                       |            |
| PMEL                                      | Thermo Fisher Scientific              | MA5-13232  |
| ACTA2                                     | Abcam                                 | ab5694     |
| mCherry                                   | Abcam                                 | ab167453   |
| pS6RP (Ser 235/236)                       | CST                                   | 2211       |
| p4E-BP1(Thr 37/46)                        | CST                                   | 2855       |
| S6RP                                      | CST                                   | 2317       |
| 4E-BP1                                    | Thermo Fisher Scientific              | AHO1382    |
| TSC2                                      | CST                                   | 4308       |
| ACTB                                      | CST                                   | 370        |
| Cleaved CASP3                             | CST                                   | 9661       |
| mCherry                                   | Thermo Fisher Scientific              | M11217     |
| AlexaFluor 488 Goat Anti-Rabbit IgG (H+L) | Thermo Fisher Scientific              | A11034     |
| AlexaFluor 488 Goat Anti-Mouse IgG (H+L)  | Thermo Fisher Scientific              | A11001     |
| AlexaFluor 555 Goat Anti-Rabbit IgG (H+L) | Thermo Fisher Scientific              | A21428     |
| AlexaFluor 555 Goat Anti-Mouse IgG (H+L)  | Thermo Fisher Scientific              | A32727     |
| AlexaFluor 647 Goat Anti-Rabbit IgG (H+L) | Thermo Fisher Scientific              | A21245     |
| AlexaFluor 647 Goat Anti-Mouse IgG (H+L)  | Thermo Fisher Scientific              | A21235     |
| AlexaFluor 680 Goat Anti-Rabbit IgG (H+L) | Thermo Fisher Scientific              | A21076     |
| AlexaFluor 680 Goat Anti-Mouse IgG (H+L)  | Thermo Fisher Scientific              | A28183     |
| DyLight 800 Goat Anti-Rabbit IgG (H+L)    | Thermo Fisher Scientific              | SA535571   |
| DyLight 800 Goat Anti-Mouse IgG (H+L)     | Thermo Fisher Scientific              | SA535521   |
| <b>Live cell imaging dyes</b>             |                                       |            |
| Hoechst 33342                             | Thermo Fisher Scientific              | H3570      |
| SyTOX Green                               | Thermo Fisher Scientific              | S7020      |
| NucView 488 Caspase-3 Enzyme Substrate    | Biotium                               | 10402      |
| Annexin V                                 | Biotium                               | 29003      |
| <b>Small molecules</b>                    |                                       |            |
| Kinase Inhibitor library                  | Ontario Institute for Cancer Research | N/A        |
| Tool Compound library                     | Ontario Institute for Cancer Research | N/A        |
| Rapamycin                                 | MilliporeSigma                        | 553211     |
| Staurosporine                             | AdooQ Bioscience                      | A10864     |
| SAHA                                      | AdooQ Bioscience                      | A10979     |
| SB939                                     | AdooQ Bioscience                      | A10830     |
| LBH589                                    | AdooQ Bioscience                      | A10518     |
| BGT226                                    | AdooQ Bioscience                      | A11162     |
| OSI-027                                   | Toronto Research Chemicals            | A611910    |
| AZD8055                                   | AdooQ Bioscience                      | A10114     |

|                                                                    |                                |                |
|--------------------------------------------------------------------|--------------------------------|----------------|
| Y-27632                                                            | AdooQ Bioscience               | A11001         |
| PR-171 (Carfilzomib)                                               | AdooQ Bioscience               | A11278         |
| BMS-354825 (Dasatinib)                                             | AdooQ Bioscience               | A10290         |
| EdU                                                                | Thermo Fisher Scientific       | A10044         |
| Sulfo-Cy5-N <sub>3</sub>                                           | Lumiprobe                      | A333           |
| Buprenorphine                                                      | Provided by animal facility    | N/A            |
| <b>Hydrogel reagents</b>                                           |                                |                |
| Sodium hyaluronate                                                 | Lifecore                       | HA-200K        |
| 5-Methylfurfurylamine                                              | TCI Chemicals                  | MFCD00143471   |
| Methylcellulose                                                    | Spectrum Chemicals             | ME137          |
| Vitronectin peptide                                                | Synthesized in house           | N/A            |
| MMP-degradable cross-linker                                        | Synthesized in house           | N/A            |
| Silica beads                                                       | VVE                            | CA75873-698    |
| Hyaluronidase                                                      | Sigma-Aldrich                  | H3884          |
| <b>Cell culture reagents</b>                                       |                                |                |
| Essential 8                                                        | Prepared in house              | N/A            |
| Matrigel                                                           | Corning                        | 354230         |
| Dispase                                                            | Stem Cell Technologies         | 7913           |
| Medium 231                                                         | Thermo Fisher Scientific       | M-231-500      |
| Smooth Muscle Growth Supplement                                    | Thermo Fisher Scientific       | S00725         |
| Trypsin                                                            | Thermo Fisher Scientific       | 25300062       |
| Collagenase from Clostridium histolyticum                          | Sigma-Aldrich                  | C0130          |
| Ethyl 3-aminobenzoate methanesulfonate (Tricaine)                  | Sigma-Aldrich                  | E10521         |
| Accutase                                                           | Stem Cell Technologies         | 7920           |
| <b>Commercial kits and materials</b>                               |                                |                |
| VEGF-D DuoSet ELISA Kit                                            | R&D Systems                    | DY622          |
| BOLT 4-12% 1 mm, 10-well gel                                       | Thermo Fisher Scientific       | NW04120BOX     |
| Stain-Free 4-20% 1mm 15-well gel                                   | Bio-Rad                        | 4568096        |
| NucleoSpin® RNA 740955.250 D-Mark Bio                              | Machery-Nagel                  | 740955.250     |
| <b>Cell models</b>                                                 |                                |                |
| H9 human embryonic stem cell, WT                                   | WiCell                         | WB67614        |
| H9 <i>TSC2</i> <sup>-/-</sup>                                      | Generated in house (14)        | N/A            |
| H9 teratoma-derived LAM cells (WT and <i>TSC2</i> <sup>-/-</sup> ) | Generated in house             | N/A            |
| <b>Animal models</b>                                               |                                |                |
| NOD.Cg-Prkdc <sup>scid</sup> Il2rg <sup>tm1Wjl</sup> /SzJ (NSG)    | Jackson Laboratory             | 005557         |
| <i>casper</i> mutant zebrafish                                     | Gift from Dr. Leonard Zon (41) | N/A            |
| <b>Software and algorithms</b>                                     |                                |                |
| ImageJ 1.53c                                                       | ImageJ                         | N/A            |
| R 4.0.3                                                            | R                              | N/A            |
| RStudio 1.3.1093                                                   | RStudio                        | N/A            |
| Gene Set Enrichment Analysis (GSEA)                                | (43)                           | N/A            |
| Mechanism of Action Miner (Elion™)                                 | BioSymetrics                   | Described here |

944

945 **Cell culture**

946 *Pluripotent stem cell culture*

947 H9 hPSCs (female) were maintained on a thin layer of 0.16 mg/mL Matrigel at 37°C,  
948 10% CO<sub>2</sub>. Cells were fed with Essential 8 media, prepared in house. Cells were passaged by  
949 incubation with 500 μM EDTA for 3 min., then cell scraping and transfer to a new pre-coated  
950 plate by wide-bore pipette.

951

#### 952 *LAM and control cell model derivation and culture*

953 LAM cell models were established via a previously reported *in vivo* differentiation  
954 protocol of human pluripotent stem cells (23). We differentiated a previously reported pair of  
955 mCherry<sup>+</sup> WT and genome-engineered *TSC2*<sup>-/-</sup> hPSCs, derived from the H9 parental lineage  
956 (female cells) (14). First, we generated teratomas in female NOD.Cg-*Prkdc*<sup>scid</sup> *Il2rg*<sup>tm1Wjl</sup>/SzJ  
957 (NSG) mice as described in Mouse teratoma formation section. At end point, mice were  
958 euthanized and dissected under sterile conditions. The teratomas were extracted while carefully  
959 ensuring minimal mouse tissue remnants. The teratoma was minced and then rotated in a 5 U/mL  
960 Dispase solution at 37°C for 30 mins. Digested tissue was plated on a thin layer of 0.16 mg/mL  
961 Matrigel at 37°C, 5% CO<sub>2</sub> in Medium 231 containing Smooth Muscle Growth Supplement.  
962 Tissue clumps were removed the following day. The remaining monolayer was expanded and  
963 passaged by treatment with 0.05% Trypsin for 5 min. Maintenance culture conditions included a  
964 thin layer of 0.16 mg/mL Matrigel at 37°C, 5% CO<sub>2</sub> in Medium 231 containing Smooth Muscle  
965 Growth Supplement. Cells were expanded for two passages before cryopreservation and use in  
966 subsequent experiments at passages 3-5.

967

#### 968 *LAM and control cell model clonal isolation*

969 LAM cells were clonally isolated by limiting dilution. Briefly, bulk cell cultures were  
970 dissociated and serially diluted to a concentration of ~ 0.3 cells / 100  $\mu$ L. We used this  
971 concentration to optimize number of single cells isolated while minimizing two or more cells  
972 contributing to a single clone. We added 100  $\mu$ L of the suspension to each well of a 96-well plate  
973 containing a thin layer of 0.16 mg/mL Matrigel. Clones were expanded for 10 days before  
974 dissociating and plating onto the hydrogel.

975

## 976 **Hydrogel culture**

### 977 *Reagent production*

978 Hydrogel culture was conducted according to a previously established protocol (18).  
979 Briefly, a hyaluronic acid polymer backbone was derivatized with 5-methylfurfurylamine to 65%  
980 substitution (confirmed by  $^1\text{H}$  NMR). A vitronectin-mimetic peptide (maleimide)-  
981 KGGPQVTRGDVFTMPG, and MMP-degradable peptide crosslinker (maleimide)-  
982 KKGRGPQGIWGQKGPQGIWGQ-K(maleimide)S were synthesized using microwave-assisted  
983 Fmoc solid phase peptide synthesis with a CEM Liberty Blue automated peptide synthesizer.  
984 Hydrogel viscoelasticity was increased by incorporation of methylcellulose derivatized with  
985 reactive thiol groups.

986

### 987 *Hydrogel gelation and culture*

988 All chemically synthesized hydrogel components were mixed to the following final  
989 concentrations: 0.9 % methylfuronated hyaluronate, 2.3 mM MMP crosslinker, 100  $\mu$ M  
990 vitronectin peptide, and 0.05 mg/mL thiolated methylcellulose. 15  $\mu$ L of the solution was added  
991 to each well of a 384-well plate and permitted to gel at 37°C for 3 hours. Following gelation,

992 wells were hydrated with PBS and then subjected to three media washes interspaced with  
993 incubations at 37°C for 45 mins. LAM or control cells were then dissociated, added to plates  
994 containing hydrogel, and spun for 3 min. at 10g to achieve immediate contact with the hydrogel.

995

## 996 **Cell treatments**

### 997 *Drug treatments*

998 All small molecule compounds were diluted in either DMSO or PBS, unless otherwise  
999 stated. The appropriate diluent-matched vehicle control was included in every experiment. Drug  
1000 treatments were added directly to wells containing cells at 5X concentrations to avoid washing  
1001 off any cells, particularly in sensitive miniaturized formats. Rapamycin was consistently used at  
1002 a 20nM concentration. All compound treatments were conducted for 72 hours unless otherwise  
1003 stated.

1004

### 1005 *Live cell staining*

1006 Live cell staining dyes were used at the following final concentrations: 10 µg/mL  
1007 Hoechst 33342, 50 nM SyTOX Green, 4 µM Caspase-3 Enzyme Substrate, and 0.2 µg/mL  
1008 Annexin V. Dyes were incubated for 30 min. prior to imaging and added as 10X concentrates in  
1009 PBS; Annexin V diluent also contained 2.5mM CaCl<sub>2</sub>. To avoid cell detachment in the  
1010 miniaturized well format, live imaging dyes were not washed prior to imaging; this did not  
1011 impact image acquisition as dyes are minimally fluorescent unless bound to the target molecule.

1012

## 1013 **Cytotoxicity-invasion assay**

1014 Cells were permitted to invade through the hydrogel (384-well format) for 72 hrs while  
1015 incubated at 37°C and 5% CO<sub>2</sub>. At end point, Hoechst and SyTOX were added directly to all  
1016 wells as described in **Cell treatments** section. Whole-well multi-planar images were acquired by  
1017 widefield microscopy with 40 μm separation between z-stacks. Following image acquisition,  
1018 wells were fixed overnight in 10% formalin. We then added 1μg of silica beads to each well and  
1019 acquired multiplanar brightfield images, with the plane of maximal contrast used to determine  
1020 hydrogel-liquid interface (described in **Image analysis**). Acquiring location of the hydrogel  
1021 interface (i.e., start of the cellular position) is essential for accurate invasion distance calculation;  
1022 the hydrogel exhibits a meniscus which leads to a variable Z starting position depending on the  
1023 XY location.

1024

### 1025 **Three-dimensional drug screen**

#### 1026 *Screen design*

1027 Both WT and *TSC2*<sup>-/-</sup> cells were treated with every drug from the Ontario Institute for  
1028 Cancer Research (OICR) Kinase Inhibitor and Tool Compound library (total of 800 compounds)  
1029 at a concentration of 5 μM ± 20nM rapamycin. Cells were treated for 72 hr. while cultured in  
1030 hydrogel and assessed at end point for cytotoxicity and invasion modulation as described in  
1031 **Cytotoxicity-invasion assay**. Each plate included internal vehicle-treated only controls. Z' was  
1032 calculated for cytotoxicity and invasion modulation using vehicle-treated samples (negative  
1033 control), 10 μM Y27632-treated (positive control, invasion), and 5 μM Carflizomib-treated  
1034 (positive control, cytotoxicity).

1035

#### 1036 *Compound score calculation*

1037 To identify drugs with statistically significant effect(s), we computed z-scores for  
1038 invasion modulation, cytotoxicity, selective invasion modulation, and selective cytotoxicity, for  
1039 each WT and *TSC2*<sup>-/-</sup> in the presence or absence of rapamycin. We confirmed that the reference  
1040 population of vehicle-treated controls for each metric was normally distributed and variance did  
1041 not vary with effect mean. Cytotoxicity is determined by the percentage of SyTOX<sup>+</sup> cells;  
1042 invasion modulation is determined by the percentage of cells invading past the vehicle-control  
1043 median threshold (See Image analysis section). Selective cytotoxicity is determined by the  
1044 difference in cytotoxicity between WT and *TSC2*<sup>-/-</sup> cells, where positive values indicate more  
1045 dead cells in the *TSC2*<sup>-/-</sup> condition. Selective invasion modulation is determined by the difference  
1046 in cytotoxicity between *TSC2*<sup>-/-</sup> and WT cells, where positive values indicate fewer invading  
1047 cells in the *TSC2*<sup>-/-</sup> condition. We then calculated p-values and corrected for multiple hypothesis  
1048 testing by computing false discovery rates. All computation was performed using R 4.0.3 and  
1049 RStudio 1.3.1093.

1050

#### 1051 *Target enrichment analysis*

1052 To refine our candidate compound list, we performed target enrichment analysis using a  
1053 modified version of the GSEA algorithm (43). Enrichment analysis was performed separately for  
1054 cytotoxicity and invasion modulation. For cytotoxicity, we focused our compound list to drugs  
1055 that showed selective cytotoxicity, either in the presence or absence of rapamycin. If a drug was  
1056 shown to be significantly beneficial in one condition but significantly detrimental in the other, it  
1057 was excluded. We then derived a singular compound score by computing the arithmetic mean  
1058 across the two conditions. Similarly, for invasion modulation, we focused our compound list to  
1059 drugs that exhibit anti-invasion effects towards WT or *TSC2*<sup>-/-</sup> cells, either in the presence or

1060 absence of rapamycin. Again, we excluded compounds that showed opposing effects, and  
1061 derived a singular compound score by arithmetic mean across conditions.

1062 We next generated a background target list using known compound targets as annotated  
1063 by the OICR. We created generalizable categories wherever possible, however, there were many  
1064 targets that could not be grouped and conferred an  $n = 1$  category. To avoid the possibility of  
1065 bias, these categories were established by an independent author blinded to the original  
1066 compound results. Using this background list and our compound score lists as described above,  
1067 we determined target enrichment using the GSEA algorithm (43).

1068

#### 1069 *Elion<sup>TM</sup> analysis*

1070 A limitation to our analyses is the small number of compounds which were identified to  
1071 selectively eliminate *TSC2<sup>-/-</sup>* cells. We sought to extend our compound list *in silico* using a  
1072 structure-based approach with Elion<sup>TM</sup> (Mechanism of Action Miner), conducted by an  
1073 independent group. Elion<sup>TM</sup> is a software package that ingests binary phenotypic data linked to  
1074 individual drug treatments to suggest possible underlying protein targets and molecular  
1075 pathways. The platform inputs phenotypic screening data in the form of a two-column CSV file  
1076 corresponding to the chemical structure in SMILES format alongside a binary bioactivity  
1077 reading.

1078 Using this dataset, a total of 8,000 features are generated for each supplied chemical  
1079 structure. These features are comprised of chemical fingerprints (ECFP4, FCFP4, RDK-layered  
1080 fingerprint, and MACCS) alongside physical properties (e.g., molecular weight, total polar  
1081 surface area, LogP). If there are fewer than 8,000 rows in the input data set, a subset of features  
1082 are chosen for downstream machine learning. The size of this feature subset is set to be 70% of



1083 the number of rows in the input data set. Feature selection is performed using a bootstrapped  
1084 logistic regression strategy. In brief, a set number of features are sampled from the original  
1085 feature set and are used to train a logistic regression model. The coefficients of this model are  
1086 then used to rank feature importance. This process is repeated 5,000 times and the resulting  
1087 coefficients are averaged for each feature to create a summarized feature importance score.

1088       Once a feature set is chosen, a total of 6 machine learning models are built and evaluated  
1089 on the input data set (XGBoost, random forest, Gaussian naive Bayes, uniform and distance  
1090 weighted K-nearest neighbours, and Gaussian process classifiers). Each model is trained and  
1091 evaluated using 10-fold cross validation while recording classification performance according to  
1092 accuracy, ROC-AUC, precision and recall. The best performing model is then chosen and used  
1093 to rank a set of 1 million compounds (curated from public databases) according to probability of  
1094 inducing the given phenotype.

1095       Of the 1M ranked compounds, several are annotated according to experimentally  
1096 validated protein targets and mechanisms of action. The GSEA algorithm is used to determine  
1097 which of these targets and MoAs are most positively enriched within the ranked set of  
1098 compounds. We then subset this list using an FDR threshold to identify a set of enriched targets  
1099 and MoAs. Using the enriched targets, we perform gene ontology and protein family pathway  
1100 enrichment using the Fisher exact test. A Bonferroni corrected p-value threshold of 0.05 is used  
1101 to identify cellular pathways corresponding to the phenotype of interest.

1102       As a result of this process, Elion<sup>TM</sup> translates an input phenotypic screen into three  
1103 informative outputs. First, it supplies a ranked list of publicly available compounds prioritized  
1104 according to their likelihood to induce the given phenotype. Second, it provides a list of targets  
1105 and MoAs likely to mitigate the provided phenotype. Last, it annotates these targets with

1106 enriched cellular pathways. All of these results are presented in a web application annotated with  
1107 rich descriptions and link-outs to relevant genetic databases.

1108

## 1109 **Image analysis**

### 1110 *Identification of cell spatial positions and cell invasion distance*

1111 We identified XYZ cell positions in the hydrogel by analysis of the Hoechst channel z-  
1112 stack. We first determined XY positions by employing the ImageJ 1.53c “Find maxima” function  
1113 on the z-stack maximum intensity projection. We automated the determination of the noise (or  
1114 background) threshold by empirical iteration. Using the assumption that true Hoechst signal  
1115 should be substantially above background fluorescence, we computed “Find maxima” with a  
1116 liberal threshold, and then progressively increased threshold stringency until the number of  
1117 identified points did not vary with each stepwise threshold change. Each maxima was determined  
1118 to correspond to a single cell spatial location. Following, for each XY spatial position, we  
1119 iterated through the Hoechst z-stack and identified to the point of maximal intensity,  
1120 corresponding to the cell Z position.

1121 To determine the invasion distance of each single cell, we must first know the cell  
1122 starting position, which varied across XY positions due to the meniscus exhibited by the  
1123 hydrogel. To identify determine hydrogel interface Z position across the XY plane, we used the  
1124 silica bead brightfield images (described in Cytotoxicity-invasion assay). For each XY cell  
1125 spatial position, we iterated through the brightfield z-stack and identified the point of maximal  
1126 contrast, which corresponded to the layer containing silica beads (due to diffraction). We then  
1127 determined individual cell distances travelled by computing the difference between cell starting

1128 and final positions. This process, automated for high throughput analysis, was scripted in ImageJ  
1129 1.53c.

1130

### 1131 *Binarization of live cell stains*

1132 Live cell stains (i.e. SyTOX, Caspase-3 enzyme substrate, and Annexin V) were  
1133 binarized into a positive or negative signal for each cell. We first created a masking around the  
1134 Hoechst signal of each cell in the maximum intensity projection image, then measured the total  
1135 fluorescent signal of the live cell stain within each masking. To binarize in an automated fashion,  
1136 we fit an empirical probability density function (ePDF) by kernel density estimation on the  
1137 vehicle control sample values. Assuming the majority of untreated samples should be negative  
1138 for cell death stains, we determined the threshold for binarization to be the first local minimum  
1139 of the negative control ePDF. Cells across conditions were then binarized according to their  
1140 matched control threshold. This process, automated for high throughput analysis, was scripted in  
1141 ImageJ 1.53c and R 4.0.3 within the RStudio 1.3.1093 environment.

1142

### 1143 *Quantification of cellular invasion*

1144 Cellular invasion was determined by number of cells invading past a fixed distance. As  
1145 the invasion distance varied slightly batch to batch (see Fig. 1F), distance thresholds for each  
1146 experiment were based on within-experiment vehicle controls. We used both the median  
1147 invasion of vehicle controls, which is sensitive to detecting decreases in invasion, and 90<sup>th</sup>  
1148 percentile invasion of vehicle controls, which is sensitive to detecting increases in invasion.  
1149 Genotype-specific thresholds were employed due to the differing invasion distances between WT  
1150 and *TSC2*<sup>-/-</sup> cells. To determine invasion of alive cells only, SyTOX<sup>+</sup> positive cells were removed

1151 from the distribution prior to calculation of invasion percentages. This process, automated for  
1152 high throughput analysis, was scripted in R 4.0.3 within the RStudio 1.3.1093 environment.

1153

#### 1154 *Immunofluorescence stain quantification*

1155 Immunofluorescence experiments were quantified using the raw image files, ensuring the  
1156 absence of detector saturation. We created a masking around the Hoechst signal of each cell in  
1157 the maximum intensity projection image, then measured the mean fluorescent signal of the  
1158 protein-of-interest within the total masking area. Measurements per replicate were re-scaled from  
1159 0 – 1 by dividing by the replicate maximum value. We note that comparisons between plastic  
1160 and hydrogel samples cannot be directly made, as the imaging parameters differ between the  
1161 two-dimensional vs. three-dimensional environment (see Fig. 2B).

1162

#### 1163 *Invasion quantification upon zebrafish xenotransplantation*

1164 Invasion of transplanted mCherry<sup>+</sup> cells was performed in a semi-automated fashion on  
1165 blinded images (Fig. S6B). For each image, a region of interest was manually selected on the  
1166 maximum intensity Z projection, to distinguish areas with mCherry<sup>+</sup> cells from surrounding  
1167 auto-fluorescent regions (e.g., zebrafish eye, yolk sac, ossicle). Images were then binarized using  
1168 a constant threshold to distinguish positive signal from background. Pixels were classified into  
1169 “invaded” or “not invaded” based on the distance from the center of the initial injection site. We  
1170 used the average of the first local minima of the positive pixel histogram from 1 day post  
1171 injected images to determine the distance for classification of invaded or not. Following pixel  
1172 classification, the ratio of the total positive pixel intensity in each group was computed to

1173 determine the zebrafish invasion score. Groups were then unblinded and graphed. This process  
1174 was scripted in ImageJ 1.53c and R 4.0.3 within the RStudio 1.3.1093 environment.

1175

## 1176 **RNA-seq**

### 1177 *RNA extraction and quality control*

1178 Extraction of RNA from cells embedded in hydrogel is made challenging by the low  
1179 cellular density relative to the abundant extracellular matrix. To extract RNA, we developed an  
1180 extraction protocol that combines phenol-chloroform phase separation with column-based  
1181 purification. We first added TriZOL directly to wells and homogenized the cell-hydrogel mixture  
1182 using a 26-gauge needle. We then centrifuged the lysate for 5min, 12,000g, at 4°C to pellet the  
1183 cross-linked hyaluronic acid matrix. We extracted the supernatant and mixed in chloroform,  
1184 followed by centrifugation to induce phase separation. The colourless aqueous phase was  
1185 extracted and mixed with equal volumes of 70% EtOH. Following a brief incubation at room  
1186 temperature, the solution was eluted through a Machery-Nagel Nucleospin column. We  
1187 proceeded with column-based purification as per manufacturing protocol.

1188

### 1189 *RNA-sequencing and raw data processing*

1190 RNA samples were shipped to the Donnelly Sequence Centre (Toronto, Canada) for  
1191 RNA quality-control, library preparation, and next-generation sequencing. RNA integrity was  
1192 assessed via Bioanalyzer (Agilent) and only samples with RIN > 8 were prepared for sequencing.  
1193 Oligo(dT) priming via SMART-Seq v4 (Takara Bio) preparation kit was used to generate full-  
1194 length cDNA libraries. Samples were subjected to paired-end sequencing on a NovaSeq 6000,  
1195 100c (Illumina) to a depth of ~50 million reads per sample.

1196 Raw sequence read quality was assessed by *FastQC*. Read feature assignments and  
1197 duplication rates were determined using *featureCounts* and *Picard*. Overall mapping rate was  
1198 assessed with *HISAT2*. Finally, read assignment to transcripts was performed using *Salmon*,  
1199 generating a final pseudocount abundance matrix. All QC processing was summarized using  
1200 *MultiQC* and programmed in R 4.0.3 within the RStudio 1.3.1093 environment. RNA-seq data is  
1201 accessible at the Gene Expression Omnibus (GEO) repository with accession GSE179044.

1202

### 1203 *Differential gene expression and enrichment analysis*

1204 Pseudocount abundance data generated by *Salmon* was imported into the *DEseq2*  
1205 framework in R for differential expression and enrichment analysis. Principal components  
1206 analysis was conducted on all samples to visualize transcriptomes in a two-dimensional space.  
1207 For single variable differential expression testing, we subsetted samples to only include the  
1208 untreated and fit the following model:  $\sim batch + genotype + substrate$ . We then tested for genes  
1209 with significant coefficients by Wald test, separately for genotype and for culture substrate. To  
1210 assess for changes across genotype that differs between matrix condition, we again subsetted for  
1211 untreated samples and fit the following model:  $\sim batch + genotype + substrate +$   
1212  $genotype:substrate$ . The interaction term coefficient for each gene was tested for significance by  
1213 Wald test. Differentially expressed genes were called when false discovery rate (FDR)  $< 0.05$ ,  $\pm$   
1214  $|\log_2\text{FoldChange}| > 1$  (as indicated in the text).

1215 To visualize expression values by heatmap or gene cluster, sample conditions were  
1216 collapsed by abundance summation, normalized, and then transformed by regularized  $\log_2$   
1217 transformation (implemented in *DEseq2*). Heatmaps were generated using the *pheatmap* package  
1218 in R and gene clusters were generated by hierarchal clustering. GO term enrichment was

1219 performed using *clusterProfiler* on significant DEGs (FDR < 0.05,  $\pm |\log_2\text{FoldChange}| > 1$ ). All  
1220 analysis was conducted using R 4.0.3 within the RStudio 1.3.1093 environment.

1221

## 1222 **Animal studies**

### 1223 *Mouse teratoma formation*

1224 hPSCs were dissociated into single cells by Accutase treatment for 15 min at 37°C.

1225 Single cells were harvested, washed, and resuspended in 5 mg/mL Matrigel. Female 8-week-old

1226 NSG mice were treated with buprenorphine 1 hour before injection, then anesthetized by

1227 isofluorane under a continuous stream of O<sub>2</sub>. We bilaterally injected 1x10<sup>6</sup> hPSC into the mouse

1228 tibialis anterior. We allowed teratomas to grow over a 12-week period, after which mice were

1229 sacrificed and teratomas extracted.

1230

### 1231 *Mouse subcutaneous xenografts*

1232 LAM cells were dissociated into single cells by 0.05% Trypsin treatment for 5 min. at

1233 37°C, washed, and resuspended in 5 mg/mL Matrigel. Female 8-week-old NSG mice were

1234 anesthetized by isofluorane under a continuous stream of O<sub>2</sub> and injected with 1x10<sup>6</sup> cells

1235 subcutaneously in each rear flank. We monitored for palpable tumor growth weekly over a four-

1236 month period, after which animals were sacrificed.

1237

### 1238 *Mouse IVIS image acquisition*

1239 Female 8-week-old NSG mice that were injected with LAM cells in each rear flank were

1240 monitored for tumor growth by endogenous mCherry expression of LAM cells. Mice were

1241 anesthetized by isofluorane under a continuous stream of O<sub>2</sub> and shaved to eliminate background

1242 fluorescence from the fur coat. Mice were then imaged at fixed exposure times by *in vivo*  
1243 imaging (PerkinElmer, IVIS®).

1244

1245 *Zebrafish toxicity assay*

1246 72-hour post-fertilization (hpf) zebrafish larvae were arrayed one larva per well in a 96-  
1247 well plate and treated with increasing concentrations of each inhibitor for 72 hrs to ascertain  
1248 toxicity thresholds. There were no *in vivo* toxic effects at the experimental *in vitro* concentrations  
1249 and thus, zebrafish experimental doses were chosen to stay consistent with *in vitro* treatment  
1250 doses.

1251

1252 *Zebrafish hindbrain ventricle xenotransplantation*

1253 For each injection experiment, a separate cryovial of cells was thawed and cultured 3  
1254 days prior to zebrafish transplantation, without any subculturing. On the day of transplantation,  
1255 cells were dissociated by 0.25% trypsin, centrifuged for 5 mins at 300g, and resuspended in  
1256 approximately 30  $\mu$ L of culture medium for injection. 72 hpf zebrafish larvae were anesthetized  
1257 with 0.09 mg/mL tricaine (Millipore Sigma) and arrayed in troughs of an agarose injection plate  
1258 and used for cell transplantation using protocols described previously (44, 45). The cells were  
1259 backloaded into a pulled capillary needle and allowed to settle for approximately 20 mins at  
1260 35°C to ensure a cell pellet at the bottom of the needle. A PLI-100A Pico-liter Microinjector  
1261 (Warner Instruments) was used to manually inject 50-100 cells into the hindbrain ventricle  
1262 (HBV) of each larva. Following injections, the larvae were kept at 35°C for the remainder of the  
1263 experiment.

1264



1265 *Zebrafish drug treatments*

1266 1 day post injection (dpi), injected larvae were screened on an Axio Observer 7  
1267 fluorescent microscope under an mCherry filter to ensure the presence of cells only in the HBV.  
1268 Groups of 20-30 positively injected larvae were randomized into groups to be treated with either  
1269 vehicle control (DMSO), 20 nM rapamycin alone, 5  $\mu$ M SB939 alone, 20  $\mu$ M SAHA alone, 1  
1270  $\mu$ M LBH589 alone or with one HDACi in combination with rapamycin by immersion therapy  
1271 for 72hrs. At the experimental endpoint (3 days post-treatment) the groups of larvae were  
1272 blinded and imaged on the Axio Observer 7 using the z-stack function to capture cell movement  
1273 in all planes. Blinded groups of images were then subjected to automated invasion analysis by an  
1274 independent study author.

1275

1276 *Zebrafish whole larval dissociation and fixation*

1277 At 1 dpi (baseline) and 4 dpi (three days post-treatment), 20 larvae from each group were  
1278 euthanized and dissociated in 100mg/mL collagenase solution for approximately 30 mins. Upon  
1279 completion of dissociation (i.e., single cell suspension formed), 200  $\mu$ L of 100% FBS was added  
1280 to slow the enzymatic reaction. The samples were then centrifuged for 5 min. at 300 *g* and the  
1281 supernatant was removed, leaving a pellet of human tumor cells among the zebrafish cells. The  
1282 samples were washed once in 30% FBS in PBS and centrifuged once more for 5 min. at 300 *g*.  
1283 The supernatant was removed and 250 $\mu$ L of 4% PFA in PBS was added to each sample for 20  
1284 min. in the dark. 1mL of PBS was added and samples were centrifuged and PFA supernatant was  
1285 removed. Samples were resuspended in 500  $\mu$ L PBS, stored at 4°C, and blinded prior to flow  
1286 cytometry analysis.

1287

1288 **Immunofluorescence staining**

1289 The following protocol is for immunofluorescence staining of cells in monolayer culture  
1290 on plastic. Modifications for whole-mount (WM) staining of cells in three-dimensional hydrogel  
1291 are indicated throughout.

1292 Cells were fixed with 4% PFA for 15 min. (WM: 30 min.) at room temperature. Wells  
1293 were washed 3 x 5 min. (WM: 20 min.) with PBS, then permeabilized with 0.1% Triton-X in  
1294 PBS for 20 min. (WM: 40 min) at room temperature. Wells were washed 3 x 5 min. (WM: 20  
1295 min.) with PBS, then blocked with 1% BSA in PBS for 1 hr. (WM: 2 hr.) at room temperature.  
1296 We then added primary antibody diluted in blocking solution for overnight incubation at 4°C.  
1297 The following concentrations of antibodies were employed: PMEL (1:50), ACAT2 (1:100),  
1298 pS6RP<sup>Ser235/236</sup>(1:100), and p4E-BP1<sup>Thr37/46</sup>(1:200). The next day, wells were wash 3 x 5 min.  
1299 (WM: 5 x 30 min.) with PBS, then incubated with fluorescent secondary antibodies diluted  
1300 blocking solution for 1 hr. (WM: 2 hr.) at room temperature. All fluorescent secondary  
1301 antibodies were used at a 1:1000 dilution. Wells were then washed 3 x 5 min. (WM: 5 x 30 min.)  
1302 with PBS then counterstained with 10 µg/mL Hoechst 33342 for 30 min. (WM: 45 min.) Wells  
1303 were washed 3 x 5 min (WM: 5 x 30 min.), then mounted with a 90% glycerol (WM: PBS, as the  
1304 hydrogel disintegrates in glycerol) solution made in house, prior to imaging.

1305

1306 **Enzyme-linked immunosorbent assay (ELISA)**

1307 Maintenance cultures of cells at equivalent densities were incubated for 16 hr. in Medium  
1308 231 ± 20nM rapamycin, without serum supplement. Conditioned media was collected and  
1309 centrifuged to remove any cellular debris, then assayed by VEGF-D ELISA kit (R&D Systems,  
1310 DY622) following the manufacturer protocol.

1311

1312 **Flow cytometry**

1313 LAM cells were dissociated into single cells by 0.05% Trypsin treatment for 5 min. at  
1314 37°C, washed, and then fixed with 4% PFA for 15 min. at room temperature. Fixing solution was  
1315 diluted out 1/10 in PBS, cells were pelleted by centrifugation, and supernatant discarded. For  
1316 details on zebrafish single cell preparation, see Zebrafish whole organism dissociation and  
1317 fixation section. Fixed single cell suspensions were permeabilized with 0.1% Triton-X in PBS  
1318 for 20 min. at room temperature. Permeabilizing solution was diluted out 1/10 in PBS, cells were  
1319 pelleted by centrifugation, and supernatant discarded. Samples were then blocked with 1% BSA  
1320 or 5% Goat Serum in PBS for 1 hr. Cells were pelleted by centrifugation, supernatant discarded,  
1321 and primary antibodies diluted in blocking solution were added for overnight incubation at 4°C.  
1322 The following concentrations of antibodies were employed: PMEL (1:50), ACAT2 (1:100),  
1323 mCherry (1:1000), and Cleaved CASP3 (1:500). The next day, primary antibody solution was  
1324 diluted out 1/10 in PBS, cells were pelleted by centrifugation, and supernatant discarded.  
1325 Samples were then incubated with fluorescent secondary antibodies diluted blocking solution for  
1326 1 hr. at room temperature. All fluorescent secondary antibodies were used as a 1:1000 dilution.  
1327 Secondary antibody solution was diluted out 1/10 in PBS, cells were pelleted by centrifugation,  
1328 and supernatant discarded. Samples were next counterstained with 10 µg/mL Hoechst 33342 for  
1329 20 min. at room temperature. Hoechst 33342 solution was diluted out 1/10 in PBS, cells were  
1330 pelleted by centrifugation, and supernatant discarded. Finally, cells were strained and analyzed  
1331 using the LSRFortessa (BD) flow cytometer.

1332

1333 **Low input western blot**

1334           Hydrogel culture must be performed in a miniaturized format to maintain the appropriate  
1335 mechanics as previously reported (18). Naturally, this poses a challenge for collecting sufficient  
1336 protein for standard molecular biology methods, such as a western blot. To address this  
1337 challenge, we developed a method for a low input western blot that includes in-well lysis and  
1338 sample preparation, followed by a gel-based method for sample normalization.

1339           Samples were cultured on plastic or in hydrogel for 72 hr. Following, sample media was  
1340 aspirated to the hydrogel interface (leaving a similar volume in plastic wells) and an equivalent  
1341 volume of 2X Laemmli-RiPA buffer was added to each well. Samples were incubated for 10  
1342 min. at 37°C and triturated up and down, careful not to disturb the hydrogel. The sample volume  
1343 was then extracted and boiled for 10 min. at 70°C. As this extraction contains a large amount of  
1344 non-cellular derived protein components (due to degradation of the hydrogel MMP-cleavable  
1345 crosslinkers), standard protein quantification by colorimetric methods (e.g., BCA, and Bradford)  
1346 are not reliable. Instead, we performed total protein quantification on gel-separated samples.  
1347 First, an aliquot of each sample was electrophoresed on a stain-free 4–20% 1 mm 15-well gel,  
1348 along with a serial dilution of a sample of known concentration. The gel was then activated by  
1349 UV exposure and total protein visualized by ChemiDoc Gel Imager (Bio-Rad). We then  
1350 calculated individual sample concentrations by comparing against the within-gel standard curve,  
1351 without including bands corresponded to the hydrogel MMP peptides.

1352           After sample extraction and quantification, we analyzed samples following standard  
1353 western blotting procedures. To maximize sample input, Thermo Fisher Scientific BOLT gels  
1354 were used, which contain space for up to 60 µL of sample per lane. We first separated samples  
1355 by SDS-PAGE using a BOLT 4-12% 1 mm 10-well gel and MES running buffer. Samples were  
1356 transferred onto a 0.45 µm PVDF membrane overnight at 4°C by wet transfer with Towbin

1357 buffer (containing 0.025% SDS and 10% MeOH). The membrane was then blocked by 5% BSA  
1358 in PBS-T (0.1% Tween-20) for 1 hr. at room temperature. Following, the membrane was  
1359 incubated overnight at 4°C in primary antibodies diluted in blocking buffer at the following  
1360 concentrations: pS6RP<sup>Ser235/236</sup>(1:5000), p4E-BP1<sup>Thr37/46</sup>(1:1000), S6RP (1:500), 4E-BP1  
1361 (1:1000), TSC2 (1:5000), and ACTB (1:5000). The membrane was washed 3 x 5 min. with PBS-  
1362 T, and then incubated for 1 hr. at room temperature in fluorescent secondary antibodies diluted  
1363 1:10,000 in blocking buffer. The membrane was washed 3 x 5 min. with PBS-T and then imaged  
1364 using Odyssey Gel Imager (LI-COR Biosciences).

1365

#### 1366 **EdU proliferation assay**

1367 Cells were pulsed with 5 µM of EdU for 3 hr. Subsequently, cells were fixed with 4%  
1368 PFA for 15 min. at room temperature. Wells were washed 3 x 5 min. with PBS, permeabilized  
1369 with 0.1% Triton-X in PBS for 20 min. at room temperature, then washed again 3 x 5 min. We  
1370 prepared the click reaction by mixing the following components in the described order, in PBS,  
1371 to the indicated final concentrations: 4 mM Cu<sub>2</sub>SO<sub>4</sub>, 5 µM Sulfo-Cy5-N<sub>3</sub>, and 100 mM L-  
1372 ascorbic acid. The click reaction mix was added to wells containing cells and incubated at room  
1373 temperature for 30 min. Wells were washed 3 x 5 min. with PBS, counterstained with 10 µg/mL  
1374 Hoechst 33342 for 30 min, washed again 3 x 5 min., and then imaged.

1375

#### 1376 **Clonogenic assay**

1377 Cells were plated on the hydrogel and treated with HDAC inhibitors at the designated  
1378 concentration for 72 hr. Following treatment, wells were washed 3 x 20 min. with media to  
1379 remove the drug from solution. The hydrogel was then solubilized by addition of 150 U  
1380 hyaluronidase per 15 µL hydrogel and incubated for 1 hr. at 37°C. Following, 0.05% Trypsin

1381 was added to the wells for 10 min. at 37°C to dissociate cells. Wells were triturated and then  
1382 plated on two-dimensional tissue cultures plates, in serial dilution. Cells were permitted to  
1383 proliferate for 10 days, forming colonies from single cells. Following, wells were fixed with 4%  
1384 PFA for 15 min. at room temperature, then washed 3 x 5 min. with PBS. Colonies were stained  
1385 with 0.1% crystal violet for 1 hr. at room temperature, washed 3 x 5 min. with ddH<sub>2</sub>O, air dried,  
1386 and imaged.

## 1387 SUPPLEMENTARY FIGURES

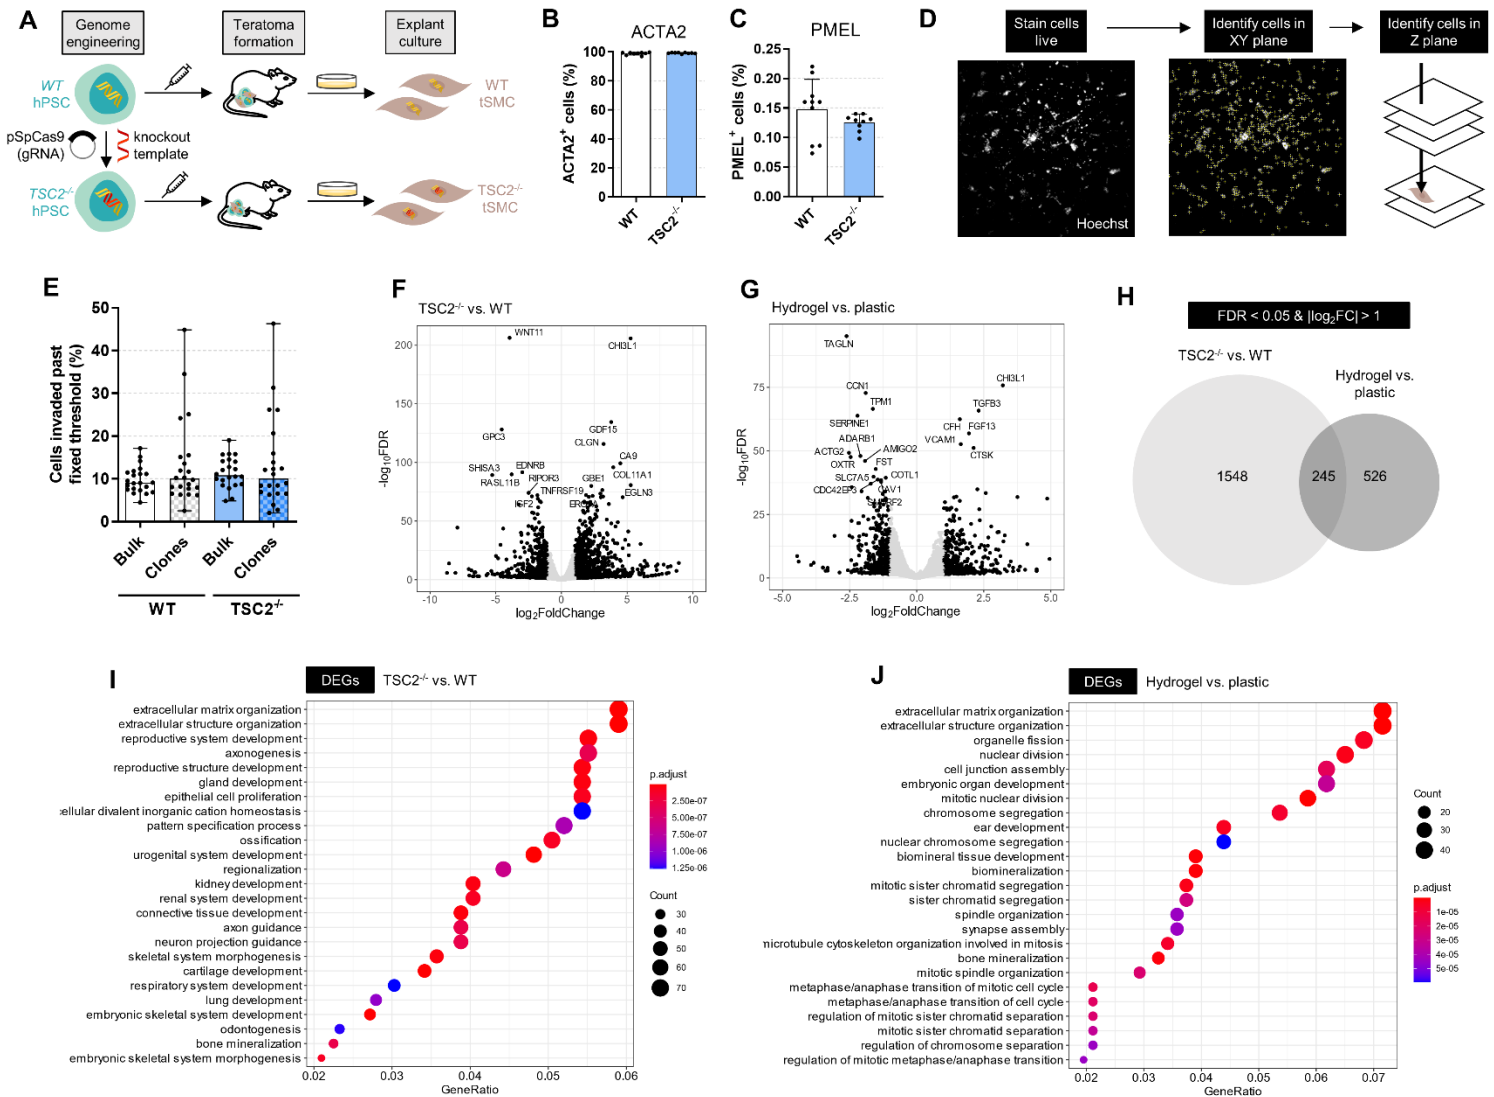

1388 **Fig. S1. Hydrogel culture of stem cell-derived disease models exhibits features of LAM.** (A)  
 1389 Schematic of generation of LAM cellular models. (B-C) Quantification of LAM markers by flow  
 1390 cytometry from cells in maintenance culture (mean ± SD; \* =  $p < 0.05$  by Student t-test;  $n = 10$ ).  
 1391 (D) Schematic of cell position identification in XYZ planes. (E) Percentage of cells invaded past  
 1392 threshold set by 90<sup>th</sup> percentile invasion distance of bulk cultures, following three-day hydrogel  
 1393 culture. Bulk cultures are maintenance cultures of LAM cell lines; clones are populations of cells  
 1394 expanded from a single cell isolated from maintenance cultures prior to seeding on hydrogel

1395 (mean  $\pm$  data range; no statistical test). (F-G) Volcano plot upon comparing *TSC2*<sup>-/-</sup> vs. WT cells  
1396 (F) and hydrogel vs. plastic samples (G). Points highlighted in black are considered differentially  
1397 expressed (FDR < 0.05 and  $|\log_2FC| > 1$ ). The 20 most significantly DEGs are noted. (H)  
1398 Overlap in DEG between genotype and culture substrate gene lists; genes considered as DEGs if  
1399 FDR < 0.05 and  $|\log_2FC| > 1$ . (I-J) Dotplot of GO term enrichment analysis of DEG lists (FDR <  
1400 0.05 and  $|\log_2FC| > 1$ ) upon comparing *TSC2*<sup>-/-</sup> vs. WT cells (I) and hydrogel vs. plastic samples  
1401 (J). The 25 most significantly enriched terms are plotted.



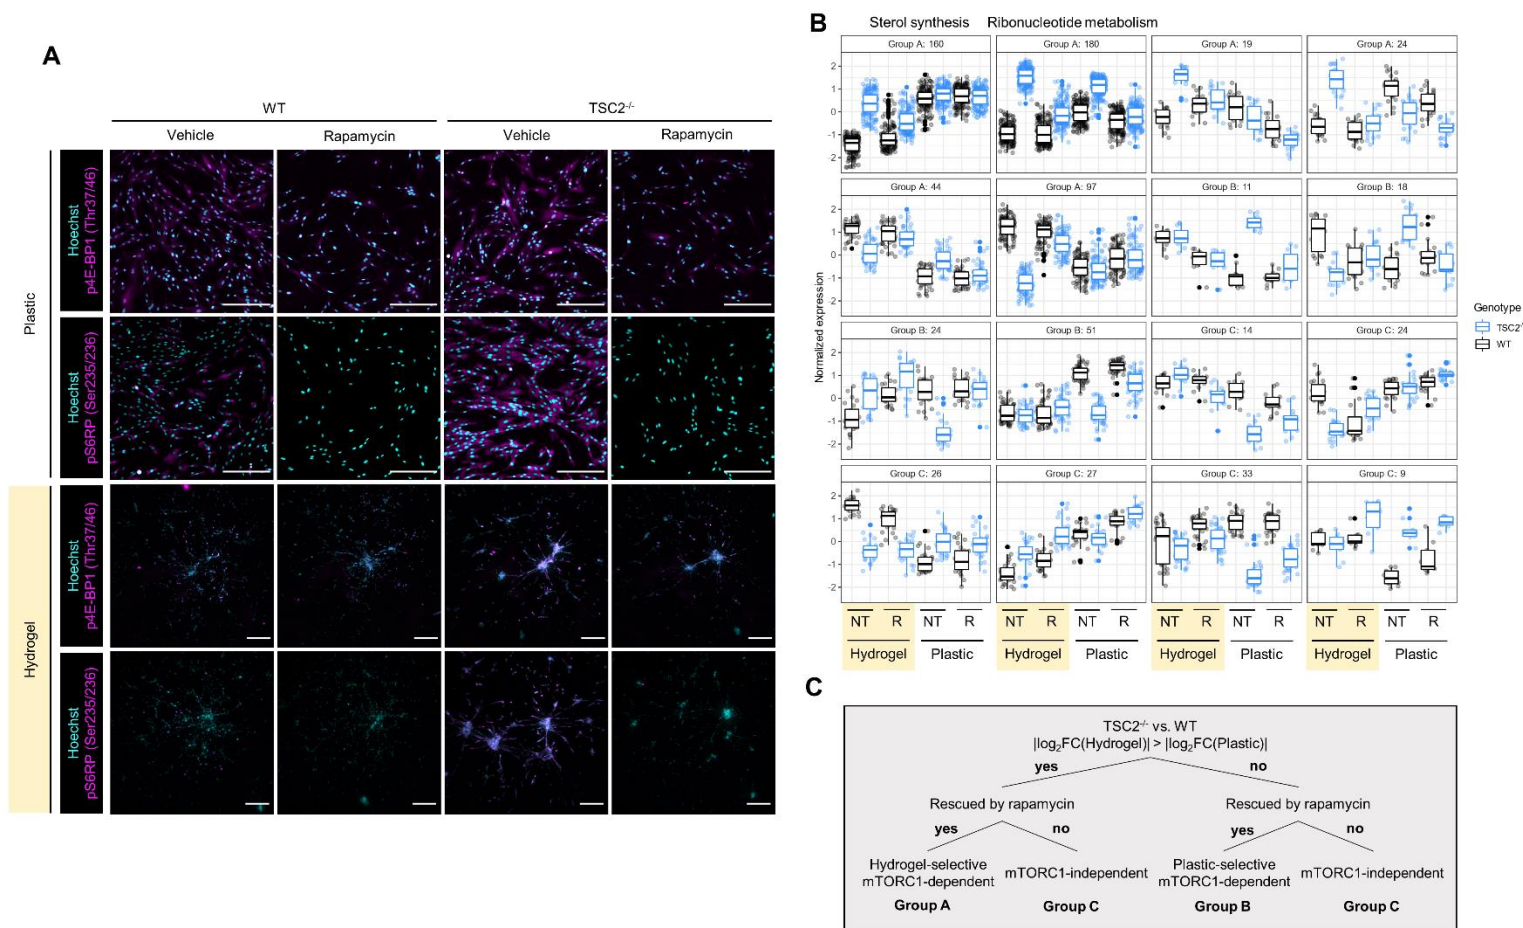

1402 **Fig. S2. Hydrogel culture potentiates differential mTORC1-signalling between WT and**  
 1403 **TSC2<sup>-/-</sup> cells.** (A) Representative maximum intensity projection images used for quantification,  
 1404 following culture on hydrogel or plastic for three days  $\pm$  20nM rapamycin. Scale bars of 250 $\mu$ m.  
 1405 (B) Gene clusters following hierarchal clustering of DEGs found significant (FDR < 0.05) in the  
 1406 interaction between genotype and ECM (761 genes). Clustering was based on the pattern of gene  
 1407 expression across the 8 employed conditions. The first two clusters are annotated to be enriched  
 1408 in sterol synthesis and ribonucleotide metabolism terms. (C) Classification scheme applied to the  
 1409 gene clusters visualized in (B). Labelling of Groups A, B, and C is for ease of visualization in  
 1410 (B) and does not confer any specific biological meaning.  
 1411

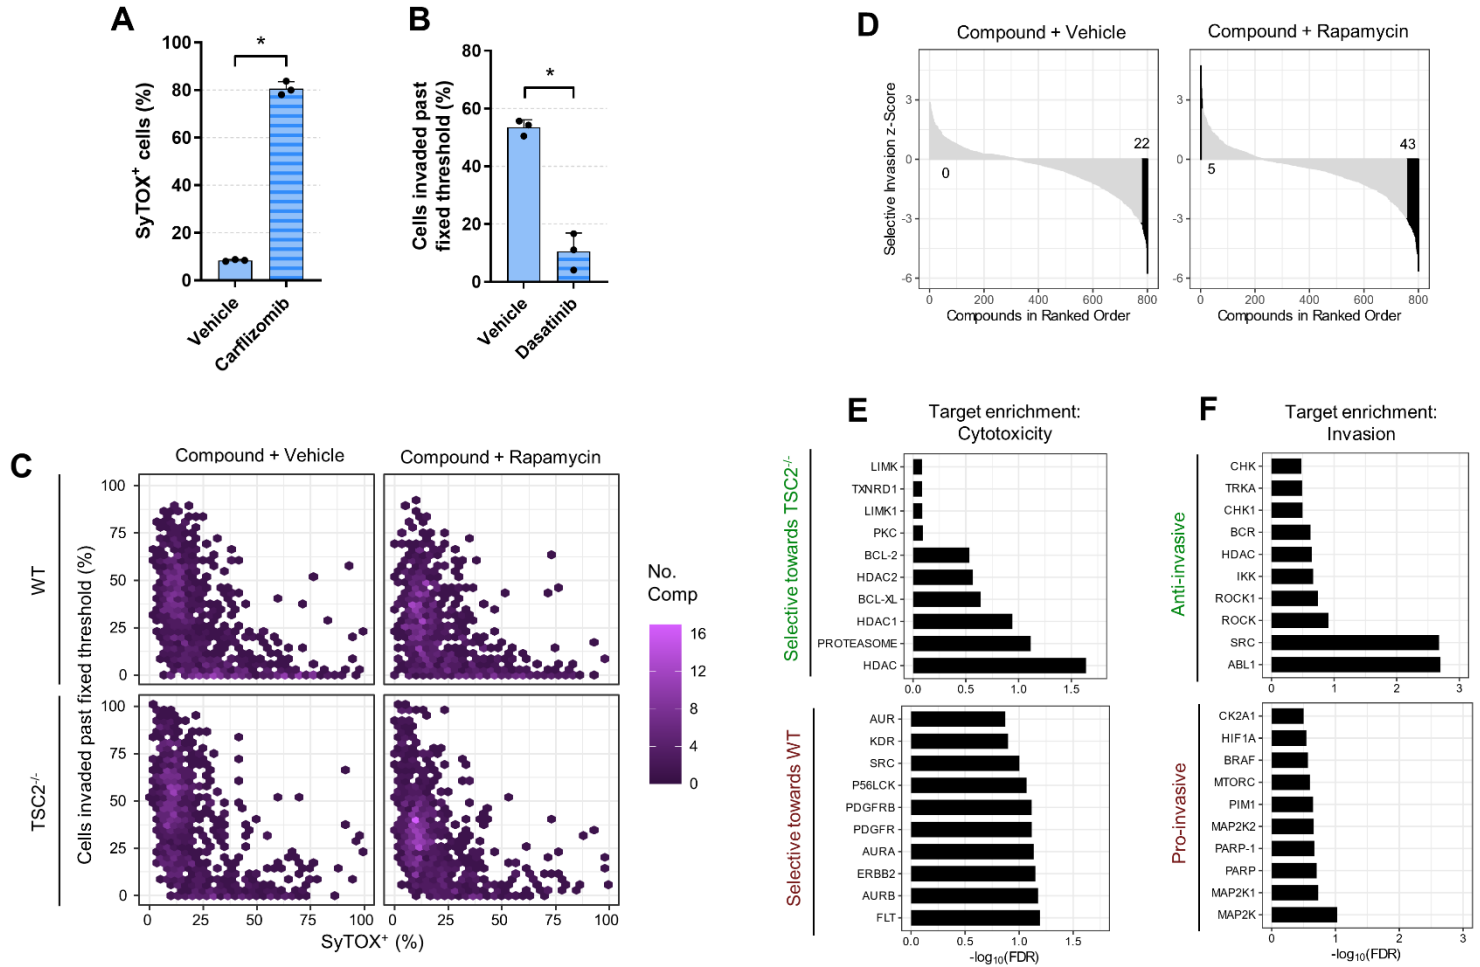

1412 **Fig. S3. Three-dimensional drug screen identifies HDAC inhibitors as anti-invasive and**  
 1413 **selectively cytotoxic towards TSC2<sup>-/-</sup> LAM cells.** (A) Percentage of SyTOX<sup>+</sup> TSC2<sup>-/-</sup> cells in  
 1414 hydrogel culture for three days ± 200nM carfilzomib (mean ± SD; \* = p < 0.05 by Student t-test;  
 1415 n = 3). (B) Percentage of TSC2<sup>-/-</sup> cells invaded past fixed threshold (determined by median  
 1416 invasion distance of untreated controls), following three-day hydrogel culture ± 40nM dasatinib  
 1417 (mean ± SD; \* = p < 0.05 by Student t-test; n = 3). (C) Compound invasion modulation plotted  
 1418 against cytotoxicity, separated by genotype and rapamycin treatment. Fixed threshold determined  
 1419 by median invasion distance of genotype-specific untreated controls. Hexagonal plot employed  
 1420 to demonstrate compound densities. (D) Waterfall plots of compound selective invasion z-scores  
 1421 in ranked order; positive values indicate greater anti-invasive effects towards TSC2<sup>-/-</sup>, negative

1422 values indicate greater anti-invasive effects towards WT. Compounds conferring statistically  
1423 significant selective invasion modulation highlighted in black. (E-F) Top 10 most statistically  
1424 significant targets enriched in screen data, stratified by screen parameter. Enrichment analysis  
1425 was performed via adaptation of the GSEA algorithm, using annotated targets of the compound  
1426 library.

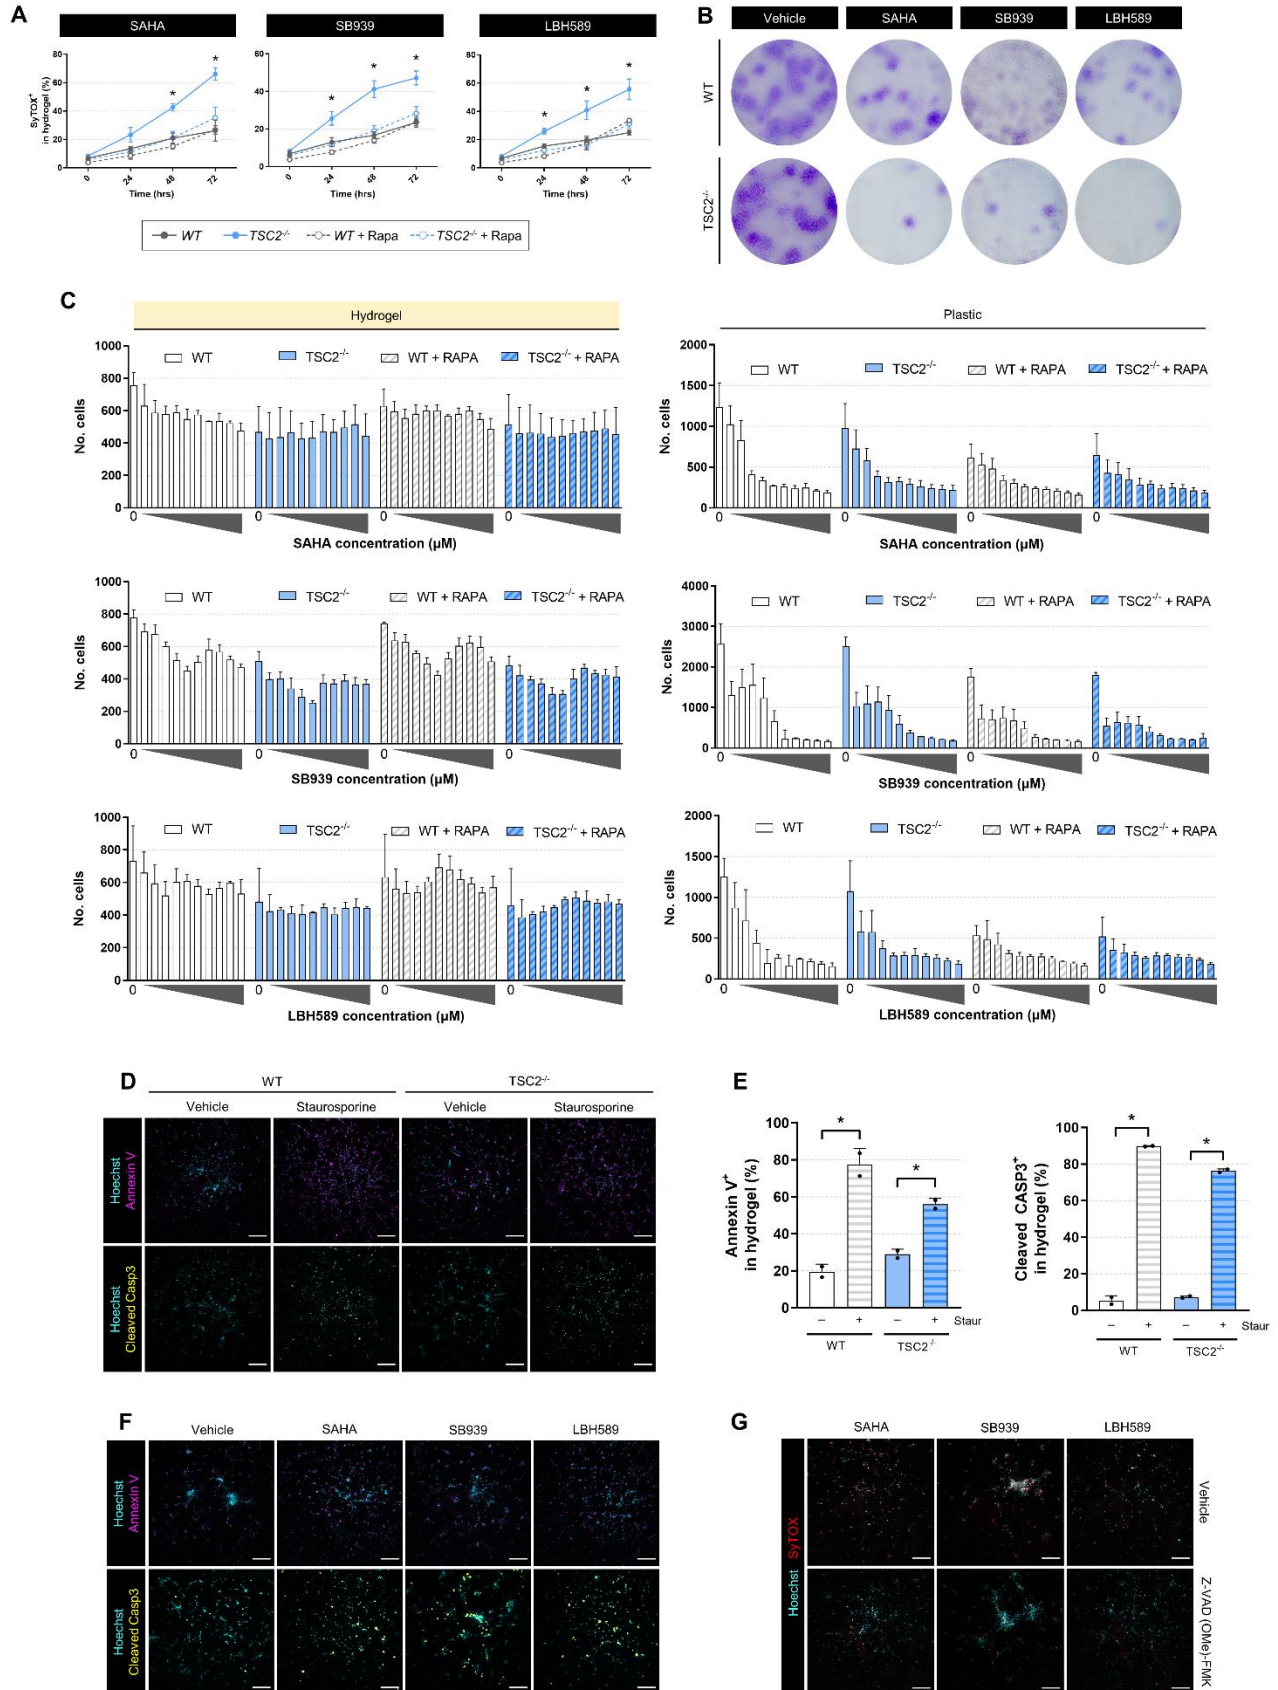

1428 **Fig. S4. Three safe-in-human HDAC inhibitors induce mTORC1-dependent selective**  
1429 **cytotoxicity exclusively in hydrogel culture.** (A) Percentage of SyTOX<sup>+</sup> cells following time-  
1430 lapse HDAC inhibitor treatment (20 $\mu$ M SAHA, 5 $\mu$ M SB939, 1 $\mu$ M LBH589) of cells cultured in  
1431 hydrogel  $\pm$  20nM rapamycin (mean  $\pm$  SD; \* =  $p < 0.05$  by two-factor ANOVA with Tukey's  
1432 post-hoc comparison;  $n = 3$ ). (B) Clonogenic assay following three-day HDAC inhibitor  
1433 treatment (20 $\mu$ M SAHA, 5 $\mu$ M SB939, 1 $\mu$ M LBH589) of cells cultured in hydrogel. After  
1434 treatment, cells were extracted from hydrogel and replated in 2D to assess clonogenicity. (C)  
1435 Number of cells detected in culture by high content imaging following three-day HDAC  
1436 inhibitor treatment in hydrogel or plastic culture  $\pm$  20nM rapamycin. Inhibitor concentrations  
1437 escalated in two-fold increments: SAHA (0.31 $\mu$ M min, 160 $\mu$ M max), SB939 (0.04 $\mu$ M min,  
1438 20 $\mu$ M max), and LBH589 (0.02 $\mu$ M min, 10 $\mu$ M max). Mean  $\pm$  SD,  $n = 3$ . (D-E) Representative  
1439 maximum intensity projection images and quantification of live cell imaging dyes used in  
1440 hydrogel culture, following 4hr treatment of 1 $\mu$ M staurosporine (mean  $\pm$  SD; \* =  $p < 0.05$  by  
1441 Student t-test;  $n = 2$ ). Scale bars of 250 $\mu$ m. (F-G) Representative maximum intensity projection  
1442 images of live cell imaging dyes used in hydrogel culture, following three-day treatment with  
1443 HDAC inhibitors (20 $\mu$ M SAHA, 5 $\mu$ M SB939, 1 $\mu$ M LBH589)  $\pm$  25 $\mu$ M Z-VAD (OMe)-FMK.  
1444 Scale bars of 250 $\mu$ m.



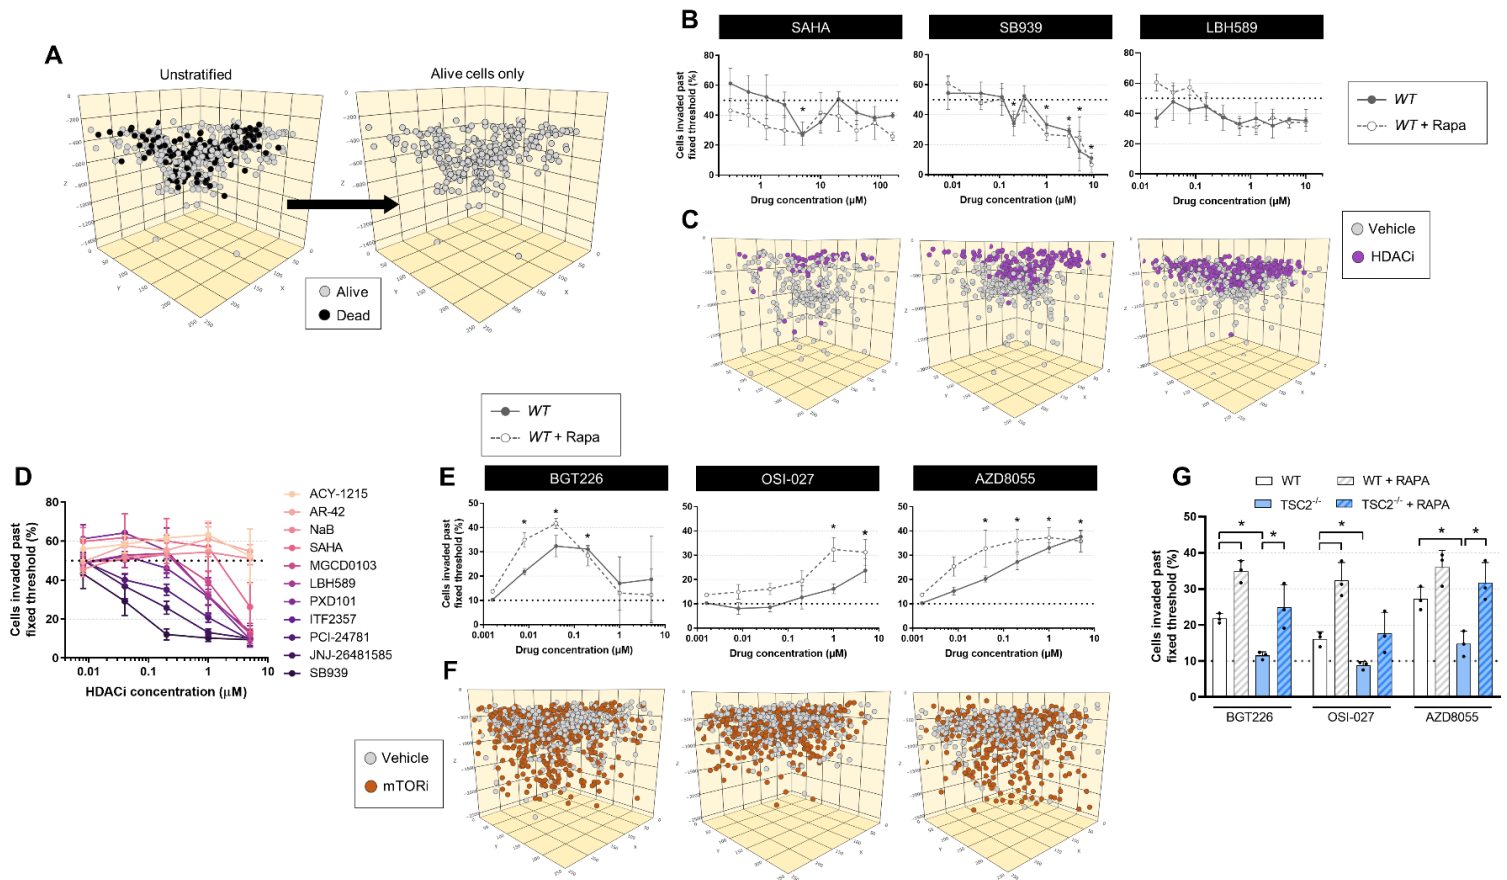

1445 **Fig. S5. HDAC inhibitors attenuate cell invasion independent of cytotoxicity while mTOR**  
 1446 **inhibitors potentiate the invasion phenotype.** (A) Schematic for removal of SyTOX<sup>+</sup> cells to  
 1447 determine invasion distribution of live cells. (B) Live WT cells invaded past fixed threshold set  
 1448 by median invasion distance of vehicle control, upon three-day HDAC inhibitor treatment ±  
 1449 20nM rapamycin (mean ± SD; \* =  $p < 0.05$  by ANOVA with Dunnett post-hoc comparison to  
 1450 untreated;  $n = 3$ ). (C) Computational reconstruction of live cell spatial positions upon three-day  
 1451 hydrogel culture of WT ± HDAC inhibitor treatment (5 $\mu$ M SAHA, 5 $\mu$ M SB939, 1 $\mu$ M LBH589).  
 1452 Note that treated and untreated were in separate wells; cells were plotted in the same volume for  
 1453 ease of visualizing relative distances travelled. (D) Effect of 11 HDAC inhibitors on *TSC2*<sup>-/-</sup> live  
 1454 cell invasion ± 20nM rapamycin. Fixed threshold set by median invasion distance of vehicle  
 1455 control. (E) Live WT cells invaded past fixed threshold set by 90<sup>th</sup> percentile invasion distance of

1456 vehicle control, upon three-day mTOR inhibitor treatment  $\pm$  20nM rapamycin (mean  $\pm$  SD; \* =  
1457  $p < 0.05$  by ANOVA with Dunnett post-hoc comparison to untreated;  $n = 3$ ). (F) Computational  
1458 reconstruction of live cell spatial positions upon three-day hydrogel culture of WT  $\pm$  mTOR  
1459 inhibitor treatment (40nM BGT226, 5 $\mu$ M OSI-027, 5 $\mu$ M AZD8055). (G) Live cells invaded past  
1460 fixed threshold set by 90<sup>th</sup> percentile invasion distance of genotype-matched vehicle control,  
1461 upon three-day mTOR inhibitor treatment (8nM BGT226, 1 $\mu$ M OSI-027, 200nM AZD8055)  $\pm$   
1462 20nM rapamycin (mean  $\pm$  SD; \* =  $p < 0.05$  by Student t-test;  $n = 3$ ).

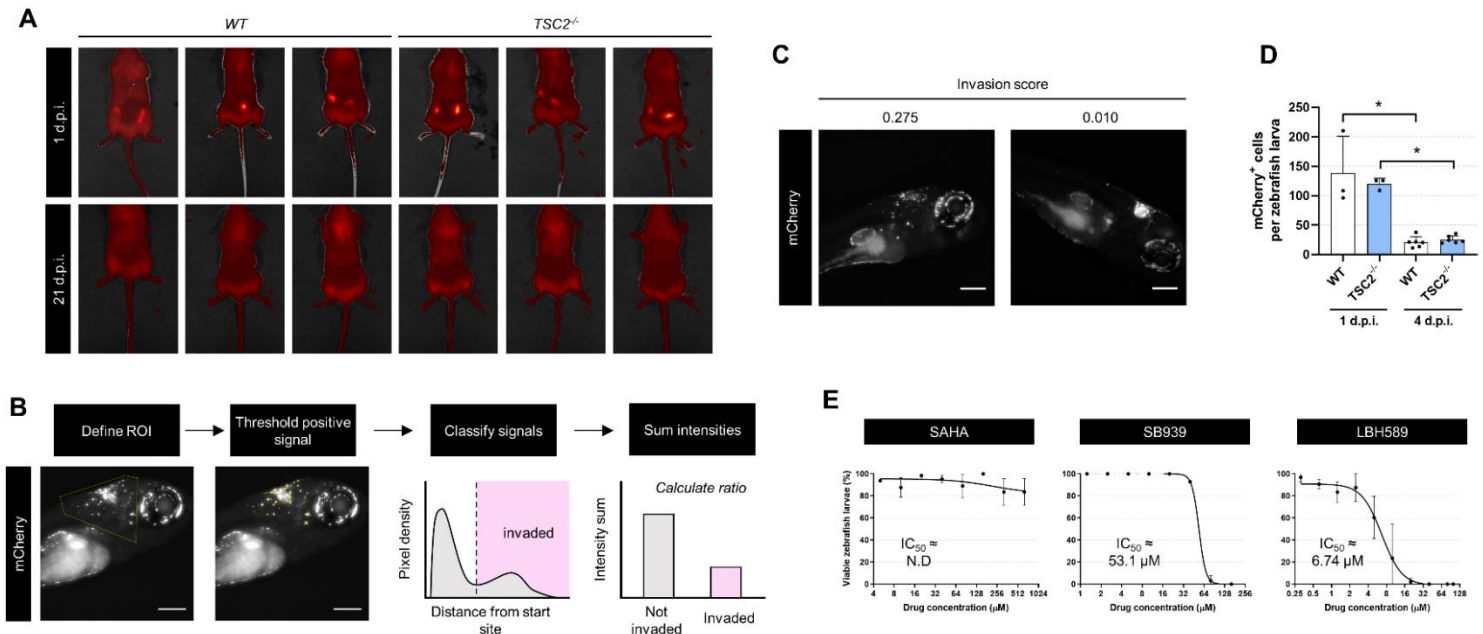

1463 **Fig. S6. HDAC inhibitors are anti-invasive and selectively cytotoxic towards TSC2<sup>-/-</sup> cells**

1464 **xenotransplanted into zebrafish.** (A) Visualization of mCherry<sup>+</sup> cells by IVIS following

1465 subcutaneous transplantation into rear flanks of immunodeficient NSG mice. (B) Schematic

1466 representation of invasion score calculation in zebrafish larvae. See Supplementary Materials and

1467 Methods for more details. Scale bars of 200μm. (C) Representative images of TSC2<sup>-/-</sup> mCherry<sup>+</sup>

1468 cells disseminated 4 dpi with the associated invasion score. Scale bars of 200μm. (D) Number of

1469 mCherry<sup>+</sup> cells per zebrafish detected by flow cytometry following whole larvae dissociation at 1

1470 and 4 dpi. Each replicate is a pool of 15 – 20 zebrafish larvae (mean ± SD; \* = p < 0.05 by

1471 Student t-test; n = 3 – 6). (E) Dose-toxicity curves of zebrafish larvae treated with HDAC

1472 inhibitors by immersion therapy.



1473 **SUPPLEMENTARY TABLES**

1474

1475 **Table S1.** Differential gene expression analysis of bulk RNA-seq data, untreated samples only.

1476 (A) DEG analysis of genotype (*TSC2*<sup>-/-</sup> vs. WT), controlling for substrate covariate. (B) DEG

1477 analysis of substrate (hydrogel vs. plastic), controlling for genotype covariate. (C) DEG analysis

1478 of interaction between genotype and ECM.

1479

1480 **Table S2.** GO term enrichment analysis of DEG lists. (A) GO term enrichment in *TSC2*<sup>-/-</sup> vs. WT

1481 DEG list (FDR < 0.05, |log<sub>2</sub>FC| > 1). (B) GO term enrichment in hydrogel vs. plastic DEG list

1482 (FDR < 0.05, |log<sub>2</sub>FC| > 1). (C) GO enrichment of genotype:substrate interaction DEG list (FDR

1483 < 0.05).

1484

1485 **Table S3.** Three-dimensional drug screen raw data. (A) Compound information from Ontario

1486 Institute of Cancer Research kinase inhibitor and tool compound libraries. (B-C) Cytotoxicity

1487 and invasion modulation effects of compounds, (B) statistic descriptions and (C) raw data.

1488

1489 **Table S4.** Enrichment results via adaptation of GSEA. Results for statistics of (A) selective

1490 cytotoxicity, positive enrichment (i.e., selectively cytotoxic towards *TSC2*<sup>-/-</sup>), (B) selective

1491 cytotoxicity, negative enrichment (i.e., selectively cytotoxic towards WT), (C) invasion

1492 modulation, positive enrichment (i.e., attenuate invasion), (D) invasion modulation, negative

1493 enrichment (i.e., potentiate invasion).

1494

1495 **Table S5.** Elion<sup>TM</sup> structure-based compound analysis. (A-B) Significantly enriched targets and  
1496 mechanisms of action by (A) selective cytotoxicity towards *TSC2*<sup>-/-</sup> cells and (B) invasion  
1497 attenuation. (C-D) Significantly enriched GO and PFAM terms (based on significantly enriched  
1498 targets) by (C) selective cytotoxicity towards *TSC2*<sup>-/-</sup> cells and (D) invasion attenuation.

1499 **SUPPLEMENTARY MOVIES**

1500

1501 **Movie S1.** Brightfield Z-stack of WT invading through the hydrogel, counterstained with

1502 Hoechst.

1503

1504 **Movie S2.** Brightfield Z-stack of *TSC2<sup>-/-</sup>* invading through the hydrogel, counterstained with

1505 Hoechst.

1506
